# Supplementary material for: A base-catalyzed cycloisomerization of 5-cyano-pentyne derivatives: an efficient synthesis of 3-cyano-4,5-dihydro-1H-pyrroles
Source: Royal Society of Chemistry journal article supplement (doi:10.1039/c4cc04409f), 2014-01-01
Supplement: c4cc04409f1.pdf [file c4cc04409f1.pdf]

## Supporting Information

### A base-catalyzed cycloisomerization of 5-cyano-pentyne derivatives: efficient synthesis of 3-cyano-4,5-dihydro-1*H*-pyrroles

Jia Meng,<sup>a,b</sup> Yi-Jin Li,<sup>a</sup> Yu-Long Zhao,<sup>\*a</sup> Xiu-Bin Bu<sup>a</sup> and Qun Liu<sup>\*a</sup>

<sup>a</sup> Department of Chemistry, Northeast Normal University, Changchun, 130024, China.

<sup>b</sup> Department of Chemistry, Mudanjiang Normal University, Mudanjiang, 157012, China.

*e-mail:* [zhaoyl351@nenu.edu.cn](mailto:zhaoyl351@nenu.edu.cn); liuqun@nenu.edu.cn

#### Table of contents

|                                                                                                                        |         |
|------------------------------------------------------------------------------------------------------------------------|---------|
| I. General information.....                                                                                            | S2      |
| II. Synthetic procedures and analytical data of compounds <b>2</b> .....                                               | S3-S7   |
| III. Synthetic procedures and analytical data of compounds <b>4p</b> and <b>5p</b> .....                               | S8      |
| IV. Results of Cyclization Reactions of <b>1r</b> or <b>1s</b> .....                                                   | S9      |
| V. Crystal data and ORTEP drawing of compound <b>2a</b> .....                                                          | S10     |
| VI. Copies of <sup>1</sup> H NMR and <sup>13</sup> C NMR spectra of compounds <b>2</b> , <b>4p</b> and <b>5p</b> ..... | S11-S27 |

## I. General Information

All reagents were commercial and were used without further purification. Chromatography was carried on flash silica gel (300-400 mesh). All reactions were monitored by TLC, which was performed on precoated aluminum sheets of silica gel 60 (F<sub>254</sub>). Melting points were uncorrected. The <sup>1</sup>H NMR spectra were recorded at 500 MHz in CDCl<sub>3</sub> and the <sup>13</sup>C NMR spectra were recorded at 125 MHz in CDCl<sub>3</sub> with TMS as internal standard. All coupling constants (*J* values) were reported in Hertz (Hz). High-resolution mass spectra (HRMS) were obtained using a Bruker microTOF II focus spectrometer (ESI). The compound **2a** was glued on a glass fiber. Data were collected at 293 K using graphite-monochromated Mo K $\alpha$  radiation ( $\lambda$  = 0.71073 Å) and IP technique in the range  $2.19^\circ < \theta < 27.48^\circ$ . Empirical absorption correction was applied. The structures were solved by the direct method and refined by the full-matrix least-squares method on  $F^2$  using the SHELXS 97 crystallographic software package. Anisotropic thermal parameters were used to refine all non-hydrogen atoms. Hydrogen atoms were located from difference Fourier maps.

## II. General Procedure for the Preparation of **2** from **1** (**1a** as Example):

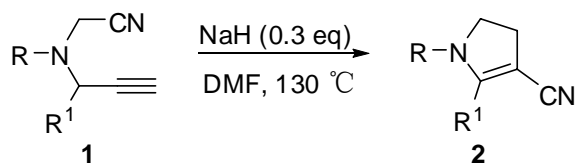

To a stirred solution of 2-(prop-2-ynyl(p-tolyl)amino)acetonitrile **1a** (0.5 mmol, 92 mg) in DMF (2.0 mL) was added NaH (NaH 60%, 0.25 mmol, 6 mg) in one portion. The reaction mixture was stirred for 7 h at 130 °C. After **1a** was consumed (monitored by TLC), the reaction mixture was poured into ice-water (20.0 mL) and extracted with CH<sub>2</sub>Cl<sub>2</sub> (3×10 mL). The combined organic extracts were dried over anhydrous MgSO<sub>4</sub>, filtered and concentrated under reduced pressure to yield the corresponding crude product, which was purified by chromatography (silica gel, petroleum ether/ethyl acetate = 10/1, V/V) to give **2a** (85 mg, 92%) as a white solid.

### 1-p-Tolyl-4,5-dihydro-1H-pyrrole-3-carbonitrile (**2a**):

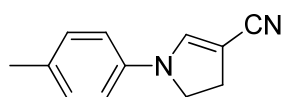

White solid; m.p. 110-112 °C. <sup>1</sup>H NMR (500 MHz, CDCl<sub>3</sub>) δ: 2.29 (s, 3H), 2.97 (t, *J* = 10.0 Hz, 2H), 3.92 (t, *J* = 10.0 Hz, 2H), 6.74 (d, *J* = 8.5 Hz, 2H), 7.11 (d, *J* = 8.0 Hz, 2H), 7.40 (s, 1H); <sup>13</sup>C NMR (125 MHz, CDCl<sub>3</sub>) δ: 20.4, 28.7, 48.9, 81.7, 113.9 (2C), 119.0, 130.0 (2C), 131.0, 138.5, 145.1; HRMS (ESI-TOF) Calcd for C<sub>12</sub>H<sub>13</sub>N<sub>2</sub><sup>+</sup> ([M + H]<sup>+</sup>): 185.1073. Found 185.1080.

### 1-Phenyl-4,5-dihydro-1H-pyrrole-3-carbonitrile (**2b**):

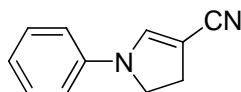

White solid; m.p. 95-97 °C. <sup>1</sup>H NMR (500 MHz, CDCl<sub>3</sub>) δ: 2.98 (t, *J* = 10.0 Hz, 2H), 3.94 (t, *J* = 10.0 Hz, 2H), 6.83 (d, *J* = 8.0 Hz, 2H), 6.97 (t, *J* = 7.0 Hz, 1H), 7.31 (t, *J* = 7.5 Hz, 2H), 7.43 (s, 1H); <sup>13</sup>C NMR (125 MHz, CDCl<sub>3</sub>) δ: 28.7, 48.7, 82.6, 113.9 (2C), 118.6, 121.4, 129.5 (2C), 140.7, 144.7; HRMS (ESI-TOF) Calcd for C<sub>11</sub>H<sub>11</sub>N<sub>2</sub><sup>+</sup> ([M + H]<sup>+</sup>): 171.0917. Found 171.0923.

**1-m-Tolyl-4,5-dihydro-1H-pyrrole-3-carbonitrile (2c):**

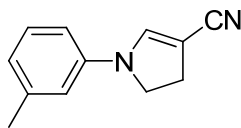

White solid; m.p. 138-140 °C.  $^1\text{H}$  NMR (500 MHz,  $\text{CDCl}_3$ )  $\delta$ : 2.34 (s, 3H), 2.98 (td,  $J$  = 10.0, 1.5 Hz, 2H), 3.93 (t,  $J$  = 10.0 Hz, 2H), 6.64 (d,  $J$  = 7.5 Hz, 2H), 6.79 (d,  $J$  = 8.0 Hz, 1H), 7.19 (t,  $J$  = 7.0 Hz, 1H), 7.44 (s, 1H);  $^{13}\text{C}$  NMR (125 MHz,  $\text{CDCl}_3$ )  $\delta$ : 21.6, 28.7, 48.8, 82.4, 111.1, 114.7, 118.8, 122.4, 129.4, 139.6, 140.8, 144.9; HRMS (ESI-TOF) Calcd for  $\text{C}_{12}\text{H}_{13}\text{N}_2^+$  ( $[\text{M} + \text{H}]^+$ ): 185.1073. Found 185.1075.

**1-o-Tolyl-4,5-dihydro-1H-pyrrole-3-carbonitrile (2d):**

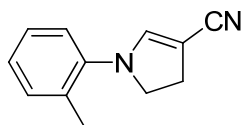

Light yellow liquid;  $^1\text{H}$  NMR (500 MHz,  $\text{CDCl}_3$ )  $\delta$ : 2.31 (s, 3H), 2.95 (td,  $J$  = 10.0, 1.5 Hz, 2H), 3.84 (t,  $J$  = 10.0 Hz, 2H), 6.97 (dd,  $J$  = 7.5, 1.0 Hz, 1H), 7.01 (s, 1H), 7.09-7.13 (m, 1H), 7.13-7.21 (m, 2H);  $^{13}\text{C}$  NMR (125 MHz,  $\text{CDCl}_3$ )  $\delta$ : 18.7, 29.3, 53.0, 80.9, 119.1, 122.5, 125.8, 127.0, 131.7, 131.9, 141.6, 151.3; HRMS (ESI-TOF) Calcd for  $\text{C}_{12}\text{H}_{13}\text{N}_2^+$  ( $[\text{M} + \text{H}]^+$ ): 185.1073. Found 185.1075.

**1-(3,5-Dimethylphenyl)-4,5-dihydro-1H-pyrrole-3-carbonitrile (2e):**

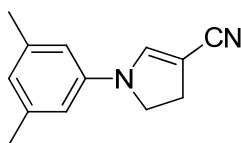

White solid; m.p. 170-172 °C.  $^1\text{H}$  NMR (500 MHz,  $\text{CDCl}_3$ )  $\delta$ : 2.29 (s, 6H), 2.95 (t,  $J$  = 10.0 Hz, 2H), 3.90 (t,  $J$  = 10.0 Hz, 2H), 6.45 (s, 2H), 6.62 (s, 1H), 7.41 (s, 1H);  $^{13}\text{C}$  NMR (125 MHz,  $\text{CDCl}_3$ )  $\delta$ : 21.4 (2C), 28.7, 48.8, 82.0, 111.9 (2C), 118.9, 123.3, 139.3 (2C), 140.7, 145.0; HRMS (ESI-TOF) Calcd for  $\text{C}_{13}\text{H}_{15}\text{N}_2^+$  ( $[\text{M} + \text{H}]^+$ ): 199.1230. Found 199.1233.

**1-(4-Methoxyphenyl)-4,5-dihydro-1H-pyrrole-3-carbonitrile (2f):**

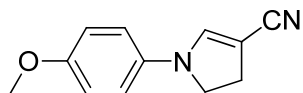

White solid; m.p. 104-106 °C.  $^1\text{H}$  NMR (500 MHz,  $\text{CDCl}_3$ )  $\delta$ : 2.96 (t,  $J$  = 10.0 Hz, 2H), 3.77 (s, 3H), 3.90 (t,  $J$  = 10.0 Hz, 2H), 6.78 (d,  $J$  = 9.0 Hz, 2H), 6.86 (d,  $J$  = 9.0 Hz, 2H), 7.33 (s, 1H);  $^{13}\text{C}$  NMR (125 MHz,  $\text{CDCl}_3$ )  $\delta$ : 28.9, 49.5, 55.6, 81.1, 114.9 (2C), 115.5 (2C), 119.1, 134.9, 145.6, 154.8; HRMS (ESI-TOF) Calcd for  $\text{C}_{12}\text{H}_{13}\text{N}_2\text{O}^+$  ( $[\text{M} + \text{H}]^+$ ): 201.1022. Found 201.1018.

**1-(4-Fluorophenyl)-4,5-dihydro-1H-pyrrole-3-carbonitrile (2g):**

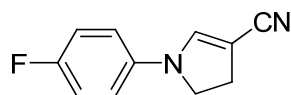

White solid; m.p. 95-97 °C.  $^1\text{H}$  NMR (500 MHz,  $\text{CDCl}_3$ )  $\delta$ : 2.99 (td,  $J$  = 9.5, 1.5 Hz, 2H), 3.92 (t,  $J$  = 10.0 Hz, 2H), 6.77-6.79 (m, 2H), 7.02 (t,  $J$  = 9.0 Hz, 2H), 7.35 (s, 1H);  $^{13}\text{C}$  NMR (125 MHz,  $\text{CDCl}_3$ )  $\delta$ : 28.9, 49.2, 82.7, 115.2 (d,  $^3J_{\text{C-F}}$  = 7.6 Hz, 2C), 116.2 (d,  $^2J_{\text{C-F}}$  = 22.8 Hz, 2C), 118.6, 137.3, 145.0, 156.8 (d,  $^1J_{\text{C-F}}$  = 239.8 Hz); HRMS (ESI-TOF) Calcd for  $\text{C}_{11}\text{H}_{10}\text{FN}_2^+$  ( $[\text{M} + \text{H}]^+$ ): 189.0823. Found 189.0829.

**1-(4-Chlorophenyl)-4,5-dihydro-1H-pyrrole-3-carbonitrile (2h):**

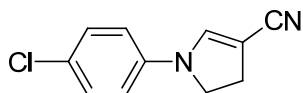

White solid; m.p. 99-101 °C.  $^1\text{H}$  NMR (500 MHz,  $\text{CDCl}_3$ )  $\delta$ : 2.99 (t,  $J$  = 10.0 Hz, 2H), 3.92 (t,  $J$  = 10.0 Hz, 2H), 6.75 (d,  $J$  = 9.0 Hz, 2H), 7.26 (d,  $J$  = 8.5 Hz, 2H), 7.37 (s, 1H);  $^{13}\text{C}$  NMR (125 MHz,  $\text{CDCl}_3$ )  $\delta$ : 28.9, 48.9, 83.7, 115.0 (2C), 118.3, 126.4, 129.5 (2C), 139.5, 144.3; HRMS (ESI-TOF) Calcd for  $\text{C}_{11}\text{H}_{10}\text{ClN}_2^+$  ( $[\text{M} + \text{H}]^+$ ): 205.0527. Found 205.0538.

**1-(Naphthalen-2-yl)-4,5-dihydro-1H-pyrrole-3-carbonitrile (2i):**

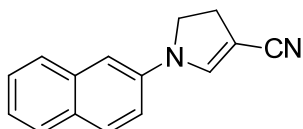

White solid; m.p. 184-186 °C.  $^1\text{H}$  NMR (500 MHz,  $\text{CDCl}_3$ )  $\delta$ : 3.01 (t,  $J = 10.5$  Hz, 2H), 4.02 (t,  $J = 10.5$  Hz, 2H), 7.01 (s, 1H), 7.12 (d,  $J = 9.5$  Hz, 1H), 7.35 (d,  $J = 7.0$  Hz, 1H), 7.43-7.47 (m, 1H), 7.54 (s, 1H), 7.69 (d,  $J = 8.0$  Hz, 1H), 7.76 (t,  $J = 9.0$  Hz, 2H);  $^{13}\text{C}$  NMR (125 MHz,  $\text{CDCl}_3$ )  $\delta$ : 28.7, 48.9, 83.0, 109.3, 115.0, 118.7, 124.1, 126.6, 127.0, 127.6, 128.9, 129.6, 134.1, 138.3, 144.7; HRMS (ESI-TOF) Calcd for  $\text{C}_{15}\text{H}_{13}\text{N}_2^+$  ( $[\text{M} + \text{H}]^+$ ): 221.1073. Found 221.1086.

**1-Benzyl-4,5-dihydro-1H-pyrrole-3-carbonitrile (2j):**

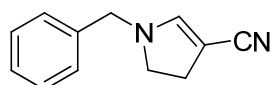

Light yellow liquid;  $^1\text{H}$  NMR (500 MHz,  $\text{CDCl}_3$ )  $\delta$ : 2.77 (t,  $J = 10.0$  Hz, 2H), 3.32 (t,  $J = 10.0$  Hz, 2H), 4.16 (s, 2H), 6.84 (s, 1H), 7.22 (d,  $J = 7.5$  Hz, 2H), 7.31 (t,  $J = 7.5$  Hz, 1H), 7.36 (t,  $J = 7.5$  Hz, 2H);  $^{13}\text{C}$  NMR (125 MHz,  $\text{CDCl}_3$ )  $\delta$ : 29.3, 50.9, 54.4, 76.7, 119.7, 127.8 (2C), 127.9, 128.7 (2C), 135.8, 153.3; HRMS (ESI-TOF) Calcd for  $\text{C}_{12}\text{H}_{13}\text{N}_2^+$  ( $[\text{M} + \text{H}]^+$ ): 185.1073. Found 185.1073.

**1-(4-Methylbenzyl)-4,5-dihydro-1H-pyrrole-3-carbonitrile (2k):**

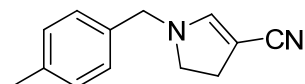

White solid; m.p. 86-88 °C.  $^1\text{H}$  NMR (500 MHz,  $\text{CDCl}_3$ )  $\delta$ : 2.34 (s, 3H), 2.75 (t,  $J = 10.0$  Hz, 2H), 3.31 (t,  $J = 10.0$  Hz, 2H), 4.11 (s, 2H), 6.82 (s, 1H), 7.10 (d,  $J = 8.0$  Hz, 2H), 7.16 (d,  $J = 8.0$  Hz, 2H);  $^{13}\text{C}$  NMR (125 MHz,  $\text{CDCl}_3$ )  $\delta$ : 21.0, 29.3, 50.8, 54.1, 76.7, 119.8, 127.8 (2C), 129.3 (2C), 132.7, 137.6, 153.2; HRMS (ESI-TOF) Calcd for  $\text{C}_{13}\text{H}_{15}\text{N}_2^+$  ( $[\text{M} + \text{H}]^+$ ): 199.1230. Found 199.1229.

**1-(4-Chlorobenzyl)-4,5-dihydro-1H-pyrrole-3-carbonitrile (2l):**

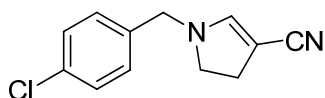

White solid; m.p. 124-126 °C.  $^1\text{H}$  NMR (500 MHz,  $\text{CDCl}_3$ )  $\delta$ : 2.77 (t,  $J = 10.0$  Hz, 2H), 3.30 (t,  $J = 10.0$  Hz, 2H), 4.14 (s, 2H), 6.83 (s, 1H), 7.17 (d,  $J = 8.0$  Hz, 2H), 7.33 (d,  $J = 7.5$  Hz, 2H);  $^{13}\text{C}$  NMR (125 MHz,

$\text{CDCl}_3$ )  $\delta$ : 29.3, 50.8, 53.7, 77.5, 119.4, 128.8 (2C), 129.1 (2C), 133.6, 134.4, 153.1; HRMS (ESI-TOF) Calcd for  $\text{C}_{12}\text{H}_{12}\text{ClN}_2^+$  ( $[\text{M} + \text{H}]^+$ ): 219.0684. Found 219.0680.

**1-Butyl-4,5-dihydro-1H-pyrrole-3-carbonitrile (2m):**

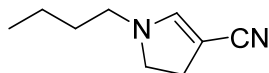

Light yellow liquid;  $^1\text{H}$  NMR (500 MHz,  $\text{CDCl}_3$ )  $\delta$ : 0.92 (t,  $J = 7.0$  Hz, 3H), 1.29-1.34 (m, 2H), 1.46-1.52 (m, 2H), 2.78 (t,  $J = 10.0$  Hz, 2H), 3.01 (t,  $J = 7.0$  Hz, 2H), 3.40 (t,  $J = 10.0$  Hz, 2H), 6.76 (s, 1H);  $^{13}\text{C}$  NMR (125 MHz,  $\text{CDCl}_3$ )  $\delta$ : 13.6, 19.7, 29.2, 30.0, 49.9, 51.0, 75.1, 120.3, 153.6; HRMS (ESI-TOF) Calcd for  $\text{C}_9\text{H}_{15}\text{N}_2^+$  ( $[\text{M} + \text{H}]^+$ ): 151.1230. Found 151.1236.

**Ethyl 2-(4-cyano-2,3-dihydro-1H-pyrrol-1-yl)acetate (2n):**

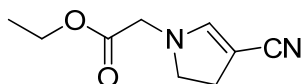

Light yellow liquid;  $^1\text{H}$  NMR (500 MHz,  $\text{CDCl}_3$ )  $\delta$ : 1.29 (t,  $J = 7.0$  Hz, 3H), 2.83 (t,  $J = 10.0$  Hz, 2H), 3.50 (t,  $J = 10.0$  Hz, 2H), 3.78 (s, 2H), 4.21 (q,  $J = 7.0$  Hz, 2H), 6.74 (s, 1H);  $^{13}\text{C}$  NMR (125 MHz,  $\text{CDCl}_3$ )  $\delta$ : 14.1, 29.7, 51.0, 51.7, 61.4, 79.2, 119.1, 153.1, 168.9; HRMS (ESI-TOF) Calcd for  $\text{C}_9\text{H}_{13}\text{N}_2\text{O}_2^+$  ( $[\text{M} + \text{H}]^+$ ): 181.0972. Found 181.0971.

**2-Methyl-1-p-tolyl-4,5-dihydro-1H-pyrrole-3-carbonitrile (2o):**

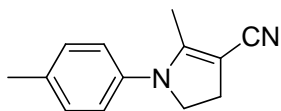

White solid; m.p. 98-100 °C.  $^1\text{H}$  NMR (500 MHz,  $\text{CDCl}_3$ )  $\delta$ : 2.00 (t,  $J = 1.5$  Hz, 3H), 2.33 (s, 3H), 2.80 (td,  $J = 9.5, 1.0$  Hz, 2H), 3.89 (t,  $J = 9.5$  Hz, 2H), 6.93 (dd,  $J = 6.5, 1.5$  Hz, 2H), 7.15 (d,  $J = 8.0$  Hz, 2H);  $^{13}\text{C}$  NMR (125 MHz,  $\text{CDCl}_3$ )  $\delta$ : 13.7, 20.8, 27.3, 54.0, 79.1, 120.6, 129.1 (2C), 129.8 (2C), 134.8, 139.0, 160.6; HRMS (ESI-TOF) Calcd for  $\text{C}_{13}\text{H}_{15}\text{N}_2^+$  ( $[\text{M} + \text{H}]^+$ ): 199.1230. Found 199.1223.

### III. General Procedure for the Preparation of 4p and 5p (4p as Example):

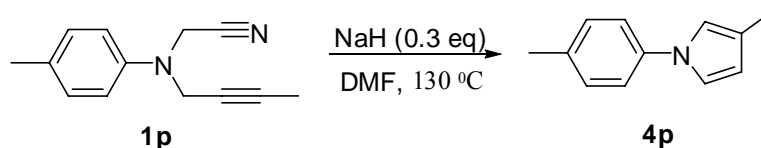

To a stirred solution of 2-(but-2-ynyl(p-tolyl)amino)acetonitrile **1p** (0.5 mmol, 99 mg) in DMF (2.0 mL) was added NaH (NaH 60%, 0.15 mmol, 6 mg) in one portion. The reaction mixture was stirred for 7 h at 130 °C. After **1p** was consumed (monitored by TLC), the reaction mixture was poured into ice-water (20.0 mL) and extracted with CH<sub>2</sub>Cl<sub>2</sub> (3×10 mL). The combined organic extracts were dried over anhydrous MgSO<sub>4</sub>, filtered and concentrated under reduced pressure to yield the corresponding crude product, which was purified by chromatography (silica gel, petroleum ether/ethyl acetate = 12/1, V/V) to give **4p** (74 mg, 86%) as a white solid.

#### 3-Methyl-1-p-tolyl-1H-pyrrole (4p):

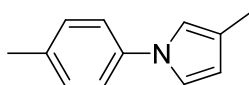

<sup>1</sup>H NMR (500 MHz, CDCl<sub>3</sub>)  $\delta$ : 2.16 (s, 3H), 2.35 (s, 3H), 6.16 (t,  $J$  = 2.5 Hz, 1H), 6.83 (d,  $J$  = 1.0 Hz, 1H), 6.95 (t,  $J$  = 2.5 Hz, 1H), 7.18 (d,  $J$  = 8.5 Hz, 2H), 7.22-7.24 (m, 2H); <sup>13</sup>C NMR (125 MHz, CDCl<sub>3</sub>)  $\delta$ : 11.9, 20.7, 111.5, 117.1, 118.9, 119.9 (2C), 120.7, 129.9 (2C), 134.8, 138.4; HRMS (ESI-TOF) Calcd for C<sub>12</sub>H<sub>14</sub>N<sup>+</sup> ([M + H]<sup>+</sup>): 172.1121. Found 172.1131.

#### 3-Methyl-1-p-tolyl-1H-pyrrole-2-carbonitrile (5p):

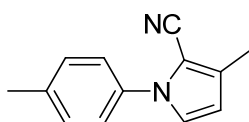

<sup>1</sup>H NMR (500 MHz, CDCl<sub>3</sub>)  $\delta$ : 2.30 (s, 3H), 2.39 (s, 3H), 6.16 (d,  $J$  = 2.5 Hz, 1H), 6.93 (d,  $J$  = 2.5 Hz, 1H), 7.26 (d,  $J$  = 8.0 Hz, 2H), 7.30 (d,  $J$  = 8.5 Hz, 2H); <sup>13</sup>C NMR (125 MHz, CDCl<sub>3</sub>)  $\delta$ : 11.9, 20.9, 103.0, 111.4, 113.9, 123.5 (2C), 126.3, 130.1 (2C), 133.9, 136.0, 137.9; HRMS (ESI-TOF) Calcd for C<sub>13</sub>H<sub>13</sub>N<sub>2</sub><sup>+</sup> ([M + H]<sup>+</sup>): 197.1073. Found 197.1065.



#### IV. Results of Cyclization Reactions of **1r** or **1s**:

In addition, the cyclization reaction of ethyl 2-acetyl-2-(cyanomethyl)pent-4-ynoate **1r** or 2-(prop-2-ynyloxy)acetonitrile **1s** was attempted. However, when the substrate **1r** or **1s** was treated with NaH (0.3-1.0 equiv) in DMF at 130 °C for 5-10 h, a complex mixture was produced, in which no desired product could be isolated.

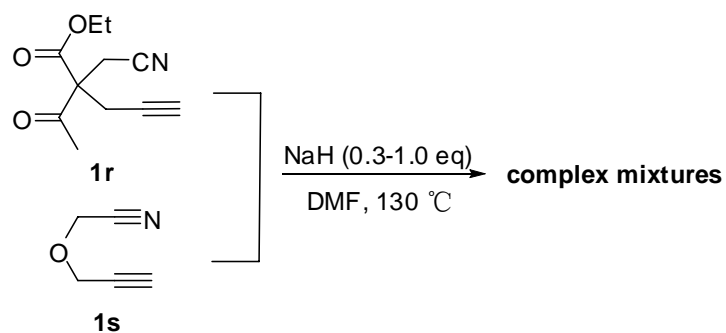

## V. Crystal data and ORTEP drawing of compound 2a:

Crystal data for **2a**: C<sub>12</sub>H<sub>12</sub>N<sub>2</sub>, white crystal,  $M = 184.24$ , Monoclinic, P2(1)/c,  $a = 7.7787(10)$  Å,  $b = 8.3955(11)$  Å,  $c = 15.691(2)$  Å,  $\alpha = 90.00^\circ$ ,  $\beta = 93.859(2)^\circ$ ,  $\gamma = 90.00^\circ$ ,  $V = 1022.4(2)$  Å<sup>3</sup>,  $Z = 4$ ,  $T = 293(2)$ ,  $F_{000} = 392$ ,  $R_1 = 0.0523$ ,  $wR_2 = 0.1252$ . CCDC 994058.

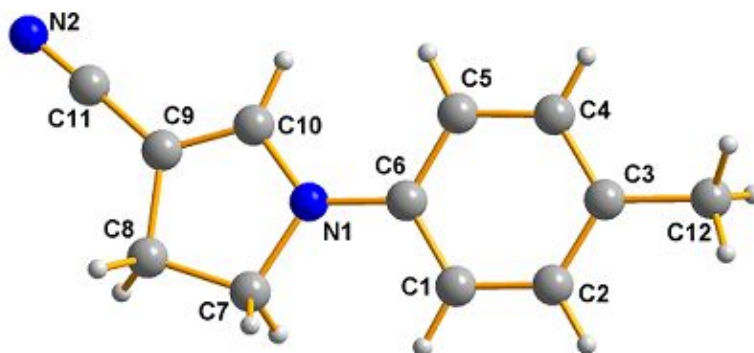

**Figure 1** ORTEP drawing of **2a**

## VI. $^1\text{H}$ and $^{13}\text{C}$ NMR spectra of substrates and products 2, 4 and 5:

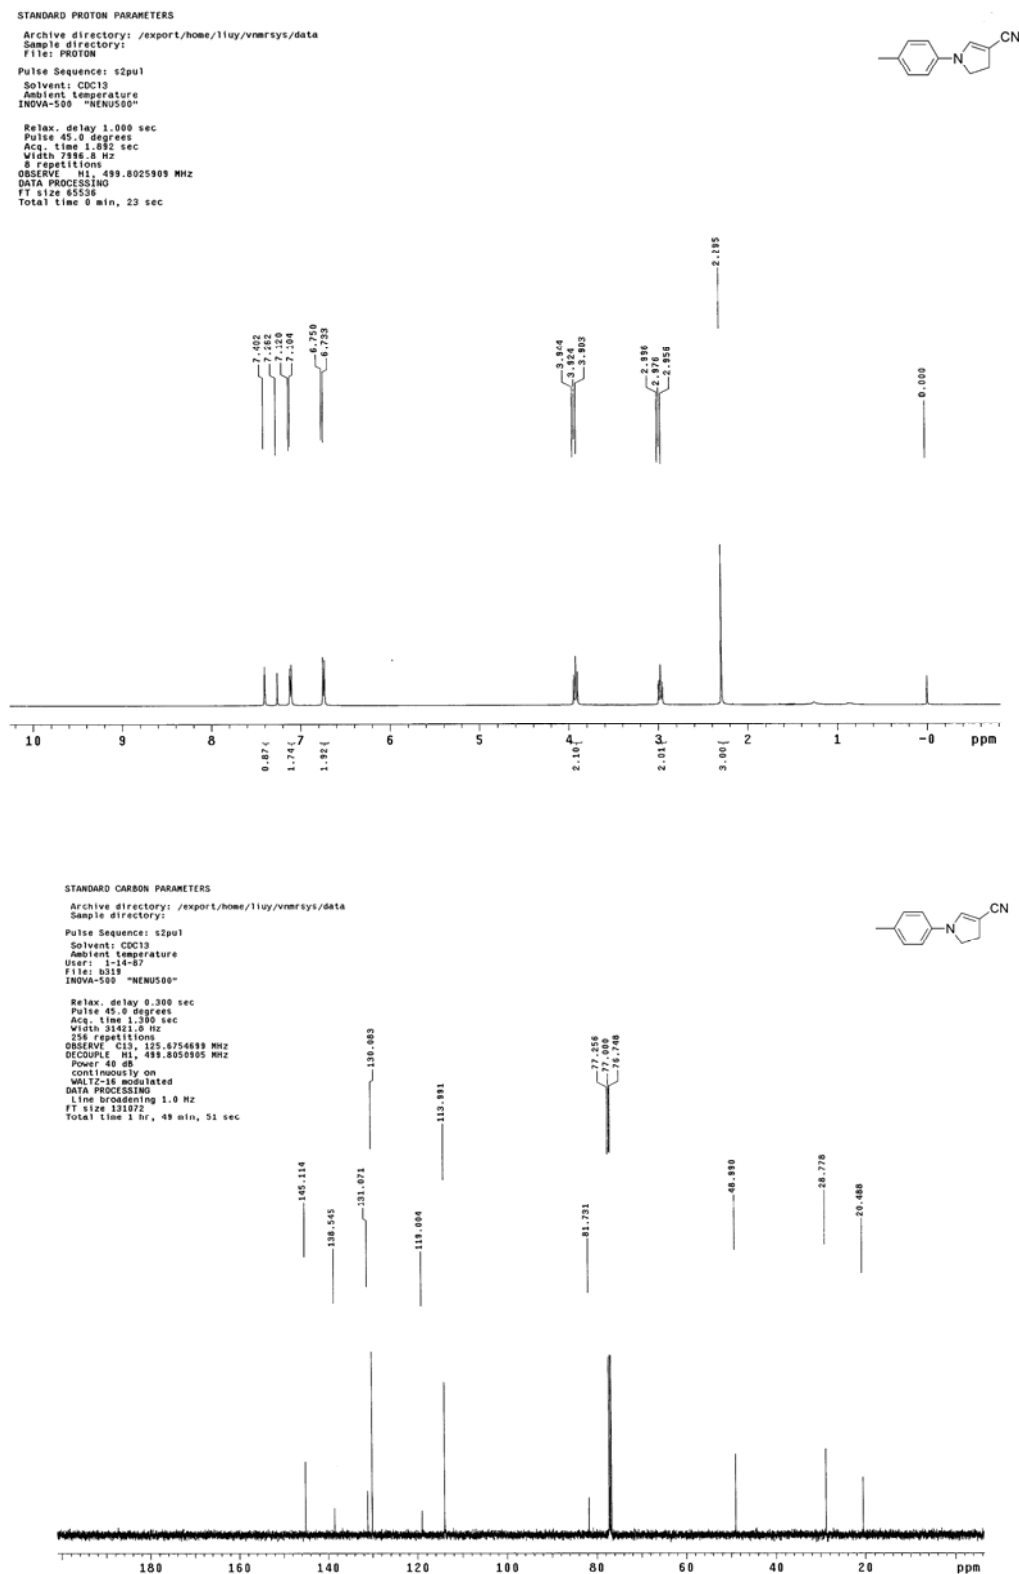

Figure 1.  $^1\text{H}$ - (upper) and  $^{13}\text{C}$ -NMR (lower) spectra of compound 2a.

STANDARD PROTON PARAMETERS  
 Archive directory: /export/home/ouyy/vnmr/sys/data  
 Sample directory:  
 Pulse Sequence: s2pul  
 Solvent: CDCl3  
 Ambient temperature  
 File: h036  
 INOVA-500 "NENU500"  
 Relax. delay 1.000 sec  
 Pulse 45.0 degrees  
 Acq. time 1.892 sec  
 Width 9102.3 Hz  
 0 repetitions  
 OBSERVE H1, 499.8025926 MHz  
 DATA PROCESSING  
 FT size 45536  
 Total time 0 min, 23 sec

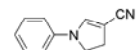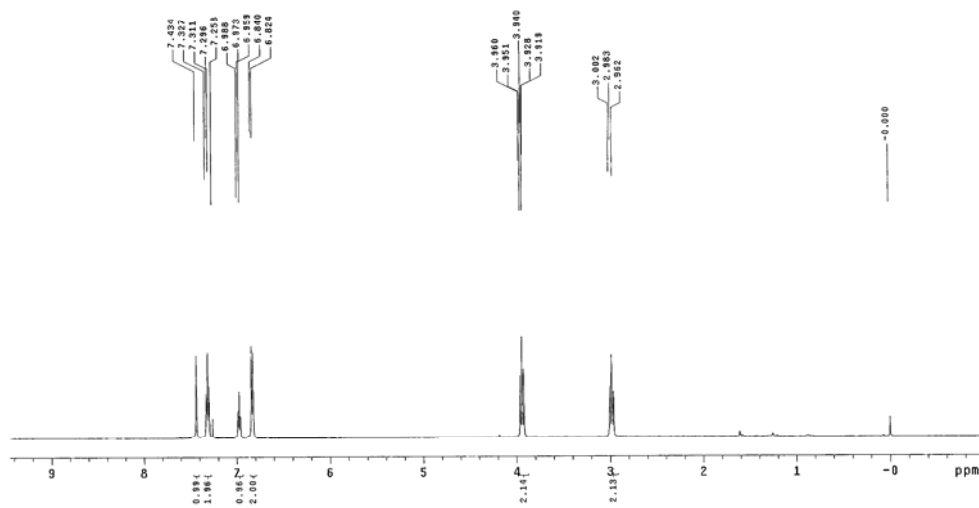

STANDARD CARBON PARAMETERS  
 Archive directory: /export/home/ouyy/vnmr/sys/data  
 Sample directory:  
 Pulse Sequence: s2pul  
 Solvent: cdcl3  
 Ambient temperature  
 User: j-14-87  
 File: h037  
 INOVA-500 "NENU500"  
 Relax. delay 0.500 sec  
 Pulse 45.0 degrees  
 Acq. time 1.300 sec  
 Width 51401.8 Hz  
 64 repetitions  
 OBSERVE C13, 125.6754747 MHz  
 DECOUPLE H1, 499.8050905 MHz  
 Power 42 dB  
 continuously on  
 WALTZ-16 modulated  
 DATA PROCESSING  
 Line broadening 1.5 Hz  
 FT size 131072  
 Total time 3 hr, 56 sec

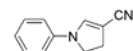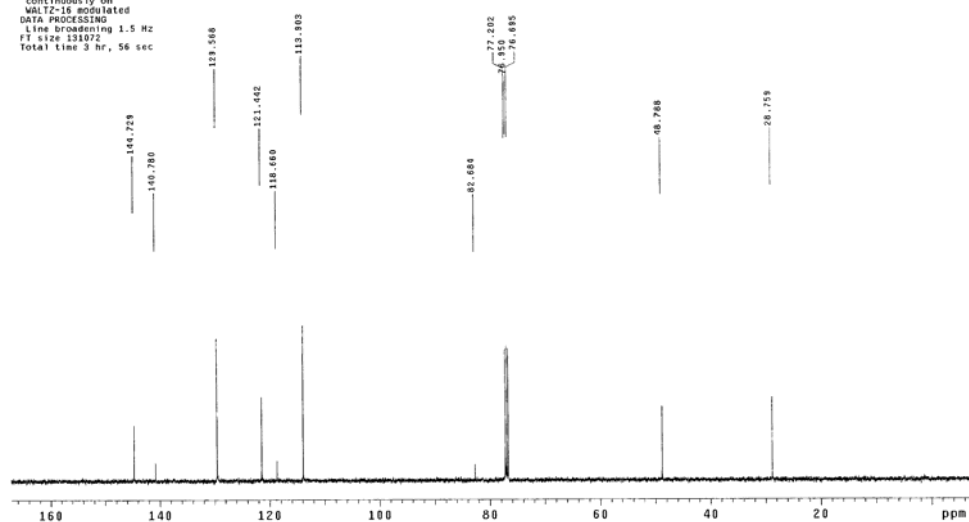

**Figure 2.**  $^1\text{H}$ - (upper) and  $^{13}\text{C}$ -NMR (lower) spectra of compound **2b**.

# STANDARD PROTON PARAMETERS

Archive directory: /export/home/ouyy/vnmrsys/data  
Sample directory:

Pulse Sequence: s2pul  
Solvent: CDCl3  
Ambient temperature  
File: m662  
INOVA-500 "NMR500"  
Relax. delay 1.000 sec  
Pulse 45.0 degrees  
Acq. time 1.892 sec  
Width 3351.3 Hz  
8 repetitions  
OBSERVE H1, 499.8025918 MHz  
DATA PROCESSING  
FT size 65536  
Total time 0 min, 23 sec

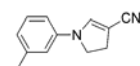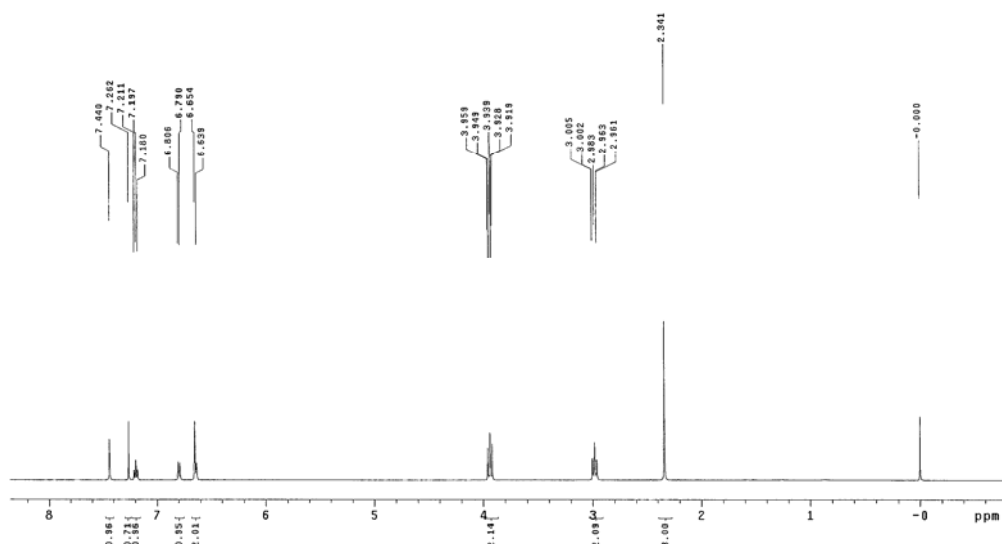

# STANDARD CARBON PARAMETERS

Archive directory: /export/home/ouyy/vnmrsys/data  
Sample directory:

Pulse Sequence: s2pul  
Solvent: cdcl3  
Ambient temperature  
User: 1-14-87  
File: m671  
INOVA-500 "NMR500"  
Relax. delay 0.500 sec  
Pulse 45.0 degrees  
Acq. time 1.300 sec  
Width 31421.8 Hz  
360 repetitions  
OBSERVE C13, 125.6754656 MHz  
DECOUPLE H1, 499.8050905 MHz  
Power 42 dB  
continuously on  
WALTZ-16 modulated  
DATA PROCESSING  
Line broadening 1.5 Hz  
FT size 131072  
Total time 12 hr, 33 min, 54 sec

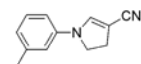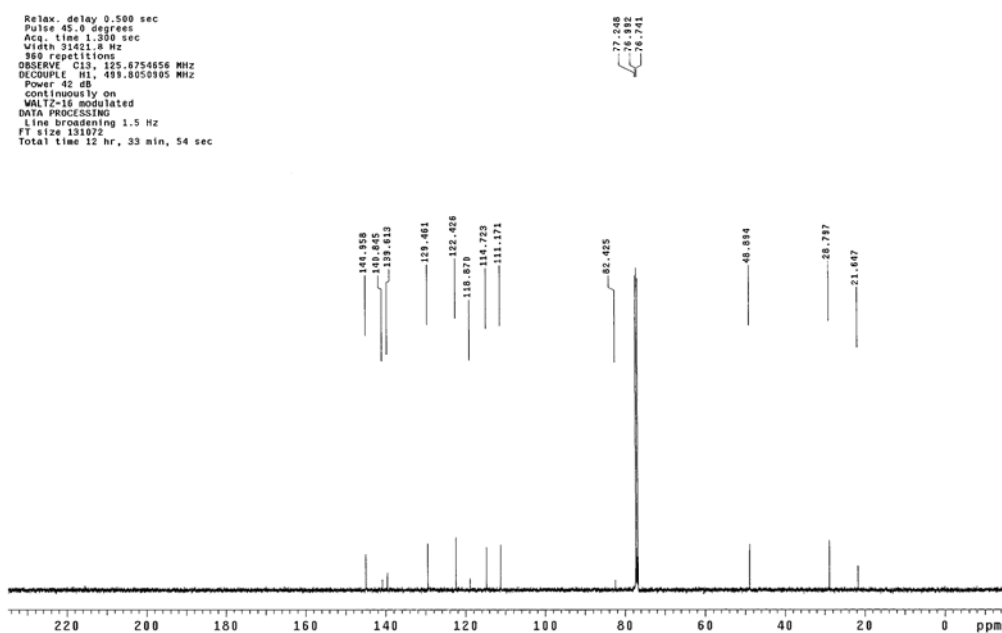

Figure 3. <sup>1</sup>H- (upper) and <sup>13</sup>C-NMR (lower) spectra of compound 2c.

# STANDARD PROTON PARAMETERS

Archive directory: /export/home/ouyy/vnmr/sys/data  
 Sample directory:  
 Pulse Sequence: s2pul  
 Solvent: CDCl3  
 Ambient temperature  
 File: n499  
 INOVA-500 "NMR500"  
 Relax. delay 1.000 sec  
 Pulse 45.0 degrees  
 Acq. time 1.852 sec  
 Width 8331.6 Hz  
 8 repetitions  
 OBSERVE H1, 499.8025924 MHz  
 DATA PROCESSING  
 FT size 65536  
 Total time 0 min, 23 sec

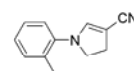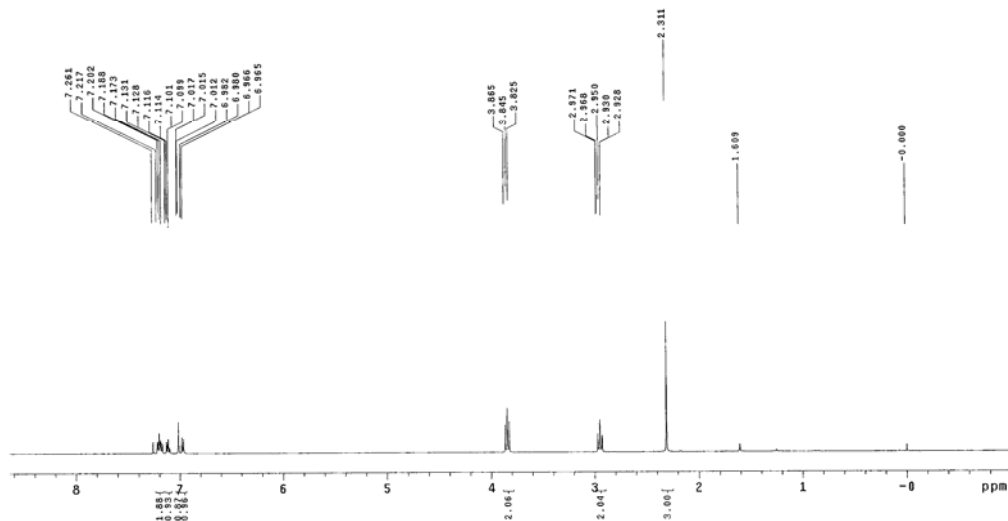

# STANDARD CARBON PARAMETERS

Archive directory: /export/home/ouyy/vnmr/sys/data  
 Sample directory:  
 Pulse Sequence: s2pul  
 Solvent: cdcl3  
 Ambient temperature  
 User: 1-14-87  
 File: n491  
 INOVA-500 "NMR500"  
 Relax. delay 0.500 sec  
 Pulse 45.0 degrees  
 Acq. time 1.350 sec  
 Width 31421.8 Hz  
 64 repetitions  
 OBSERVE C13, 125.6754699 MHz  
 DECOUPLE H1, 499.8050905 MHz  
 Power 42 dB  
 continuously on  
 WALTZ-16 modulated  
 DATA PROCESSING  
 Line broadening 1.5 Hz  
 FT size 131072  
 Total time 3 hr, 56 sec

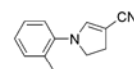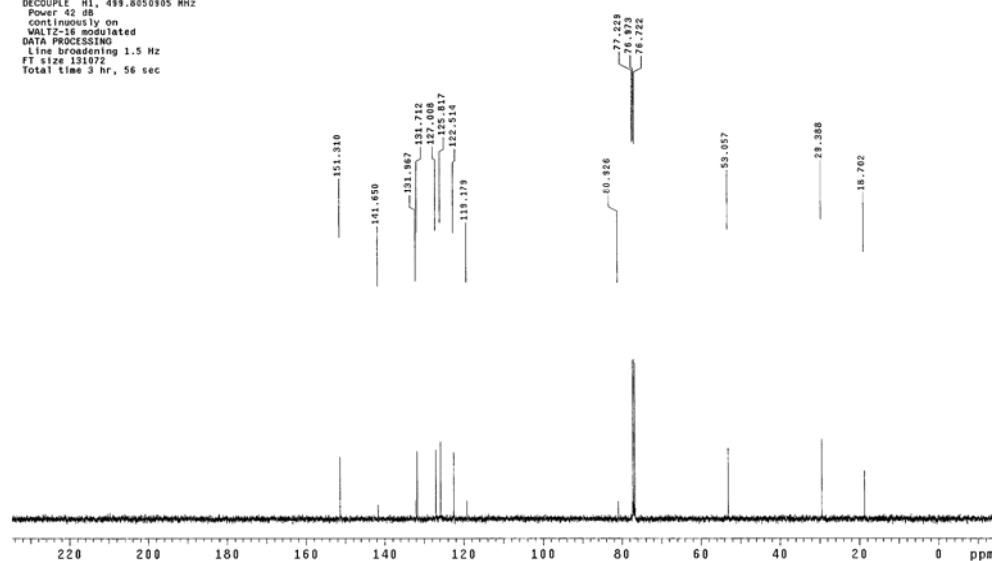

**Figure 4.** <sup>1</sup>H- (upper) and <sup>13</sup>C-NMR (lower) spectra of compound **2d**.

## STANDARD PROTON PARAMETERS

Archive directory: /export/home/ouyy/vnmrsys/data  
Sample directory:

Pulse Sequence: s2pul

Solvent: CDCl<sub>3</sub>

Ambient temperature

File: 0719

INNOVA-500 "HENU500"

Relax. delay 1.000 sec

Pulse 45.0 degrees

Acq. time 1.432 sec

Width 8508.7 Hz

8 repetitions

OBSERVE H1, 499.8025938 MHz

DATA PROCESSING

FT size 65536

Total time 0 min, 23 sec

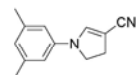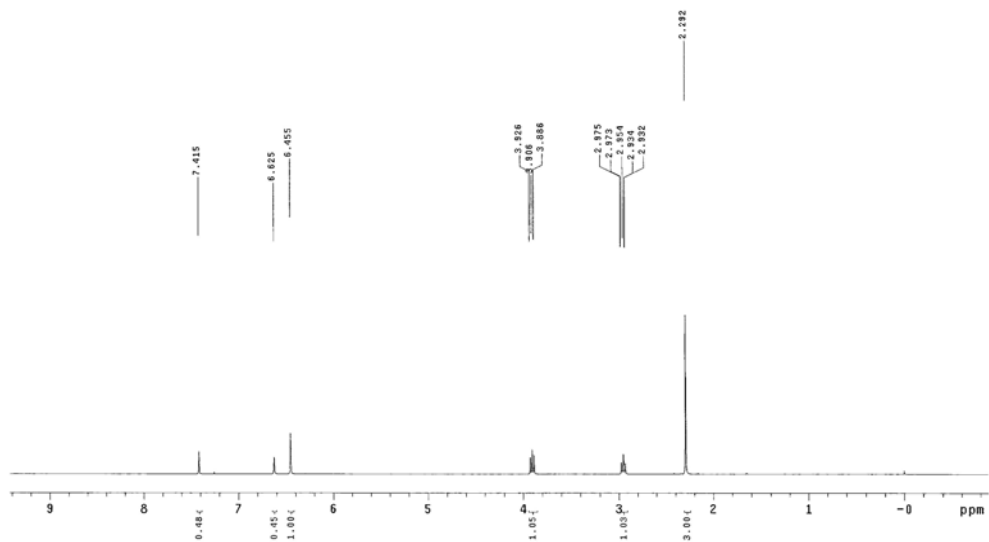

## STANDARD CARBON PARAMETERS

Archive directory: /export/home/ouyy/vnmrsys/data  
Sample directory:

Pulse Sequence: s2pul

Solvents: cdcl3

Ambient temperature

User: 1-14-87

File: 0719

INNOVA-500 "HENU500"

Relax. delay 0.500 sec

Pulse 45.0 degrees

Acq. time 1.390 sec

Width 31421.8 Hz

128 repetitions

OBSERVE C13, 125.6754728 MHz

DECOUPLE H1, 499.8050905 MHz

Power 42 dB

continuously on

WALTZ-16 modulated

Line broadening 1.5 Hz

FT size 131072

Total time 3 hr, 56 sec

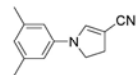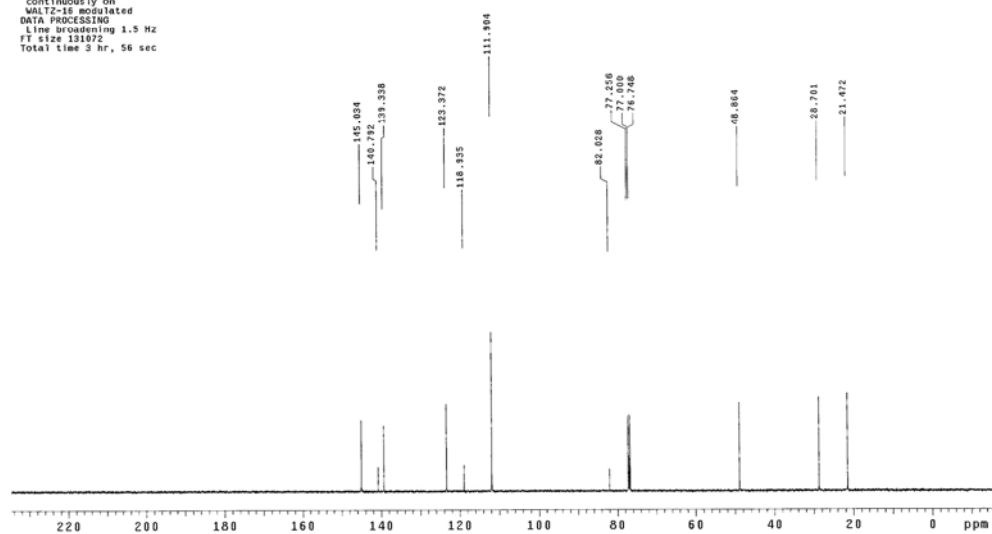

Figure 5. <sup>1</sup>H- (upper) and <sup>13</sup>C-NMR (lower) spectra of compound **2e**.

## STANDARD PROTON PARAMETERS

Archive directory: /export/home/ouyy/vnmrsys/data  
 Sample directory:  
 Pulse Sequence: s2pul  
 Solvent: CDCl<sub>3</sub>  
 Ambient temperature  
 File: 1237  
 INOVA-500 "NENU500"

Relax. delay 1.000 sec  
 Pulse 45.0 degrees  
 Acq. time 1.882 sec  
 Width 3177.5 Hz  
 8 repetitions  
 OBSERVE H1 499.8025892 MHz  
 DATA PROCESSING  
 FT size 85536  
 Total time 8 min, 23 sec

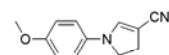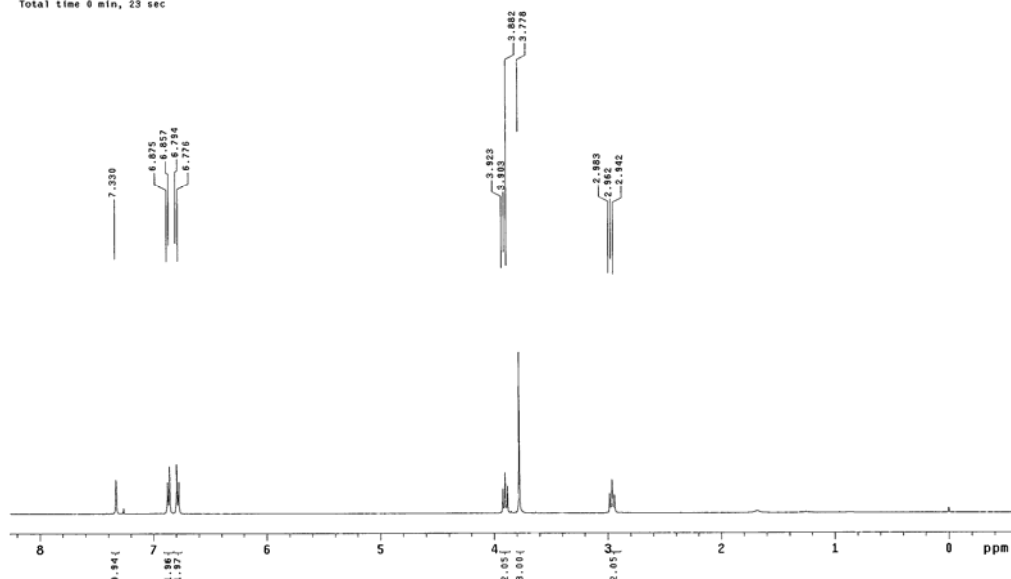

## STANDARD CARBON PARAMETERS

Archive directory: /export/home/ouyy/vnmrsys/data  
 Sample directory:  
 Pulse Sequence: s2pul  
 Solvent: cdcl3  
 Ambient temperature  
 User: 1-14-97  
 File: 1238  
 INOVA-500 "NENU500"

Relax. delay 0.500 sec  
 Pulse 45.0 degrees  
 Acq. time 1.380 sec  
 Width 31421.8 Hz  
 64 repetitions  
 OBSERVE C13 125.6754603 MHz  
 DECOUPLE H1 499.8050905 MHz  
 Power 42 dB  
 Continuously on  
 WALTZ-16 modulated  
 DATA PROCESSING  
 Line broadening 1.5 Hz  
 FT size 131072  
 Total time 2 hr, 3 min, 31 sec

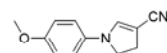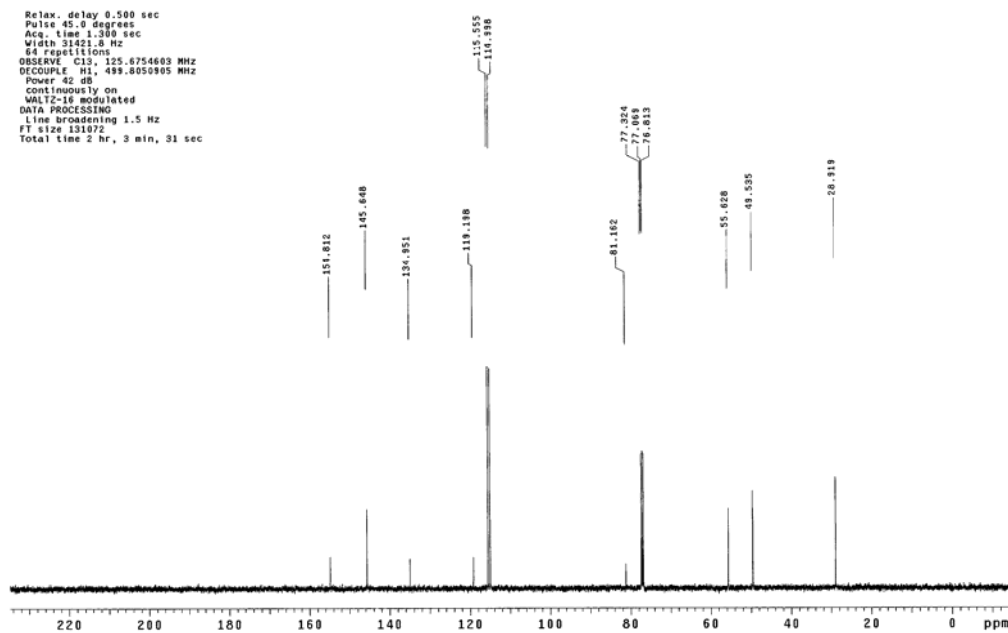

Figure 6. <sup>1</sup>H- (upper) and <sup>13</sup>C-NMR (lower) spectra of compound **2f**.



# STANDARD PROTON PARAMETERS

Archive directory: /export/home/ouyy/vnmrsys/data  
Sample directory:  
Pulse Sequence: s2pu1  
Solvent: CDCl3  
Ambient temperature  
File: n492  
INOVA-500 "MENU500"  
Relax. delay 1.000 sec  
Pulse 45.0 degrees  
Acq. time 1.892 sec  
Width 8931.6 Hz  
0 repetitions  
OBSERVE H1, 499.8025897 MHz  
DATA PROCESSING  
FT size 65536  
Total time 0 min, 23 sec

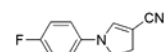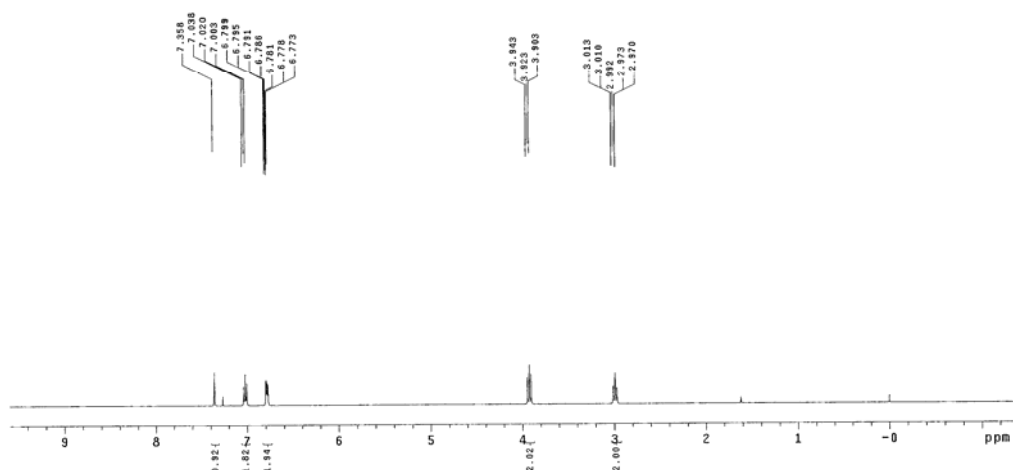

# STANDARD CARBON PARAMETERS

Archive directory: /export/home/ouyy/vnmrsys/data  
Sample directory:  
Pulse Sequence: s2pu1  
Solvent: cdcl3  
Ambient temperature  
User: 1-14-87  
File: n493  
INOVA-500 "MENU500"  
Relax. delay 0.500 sec  
Pulse 45.0 degrees  
Acq. time 1.308 sec  
Width 31421.8 Hz  
64 repetitions  
OBSERVE C13, 125.6754699 MHz  
DECOUPLE H1, 499.8050905 MHz  
Power 42 dB  
continuously on  
WALTZ-16 modulated  
DATA PROCESSING  
Line broadening 1.5 Hz  
FT size 131072  
Total time 3 hr, 56 sec

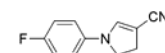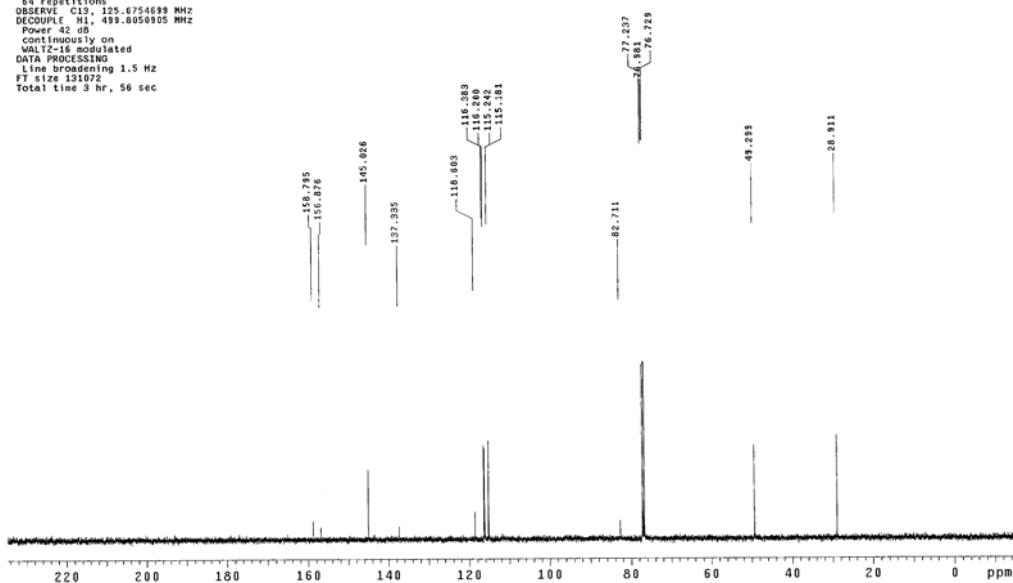

Figure 7. <sup>1</sup>H- (upper) and <sup>13</sup>C-NMR (lower) spectra of compound **2g**.

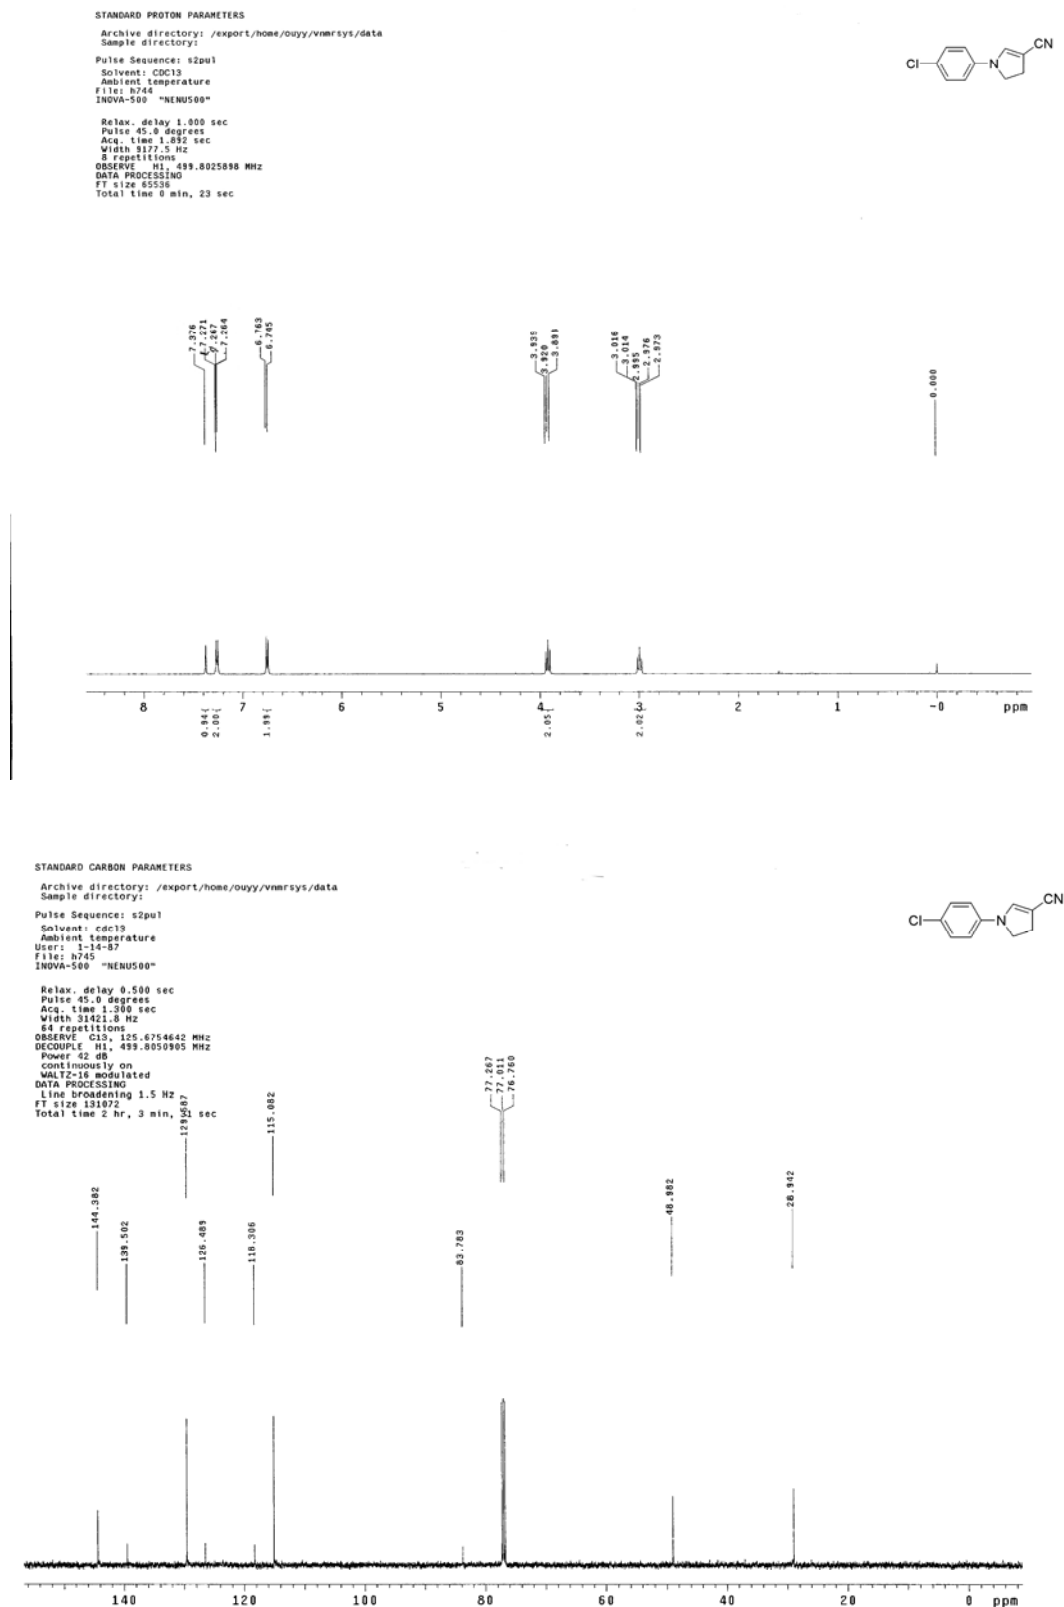

**Figure 8.** <sup>1</sup>H- (upper) and <sup>13</sup>C-NMR (lower) spectra of compound **2h**.

## STANDARD PROTON PARAMETERS

Archive directory: /export/home/ouyy/vnmrsys/data  
 Sample directory:  
 Pulse Sequence: s2pul  
 Solvent: CDCl<sub>3</sub>  
 Ambient temperature  
 File: q728  
 INOVA-500 "NMR500"

Relax. delay 1.000 sec  
 Pulse 45.0 degrees  
 Acq. time 1.532 sec  
 Width 8500.7 Hz  
 8 repetitions  
 OBSERVE H1, 499.8025914 MHz  
 DATA PROCESSING  
 FT size 65536  
 Total time 0 min, 23 sec

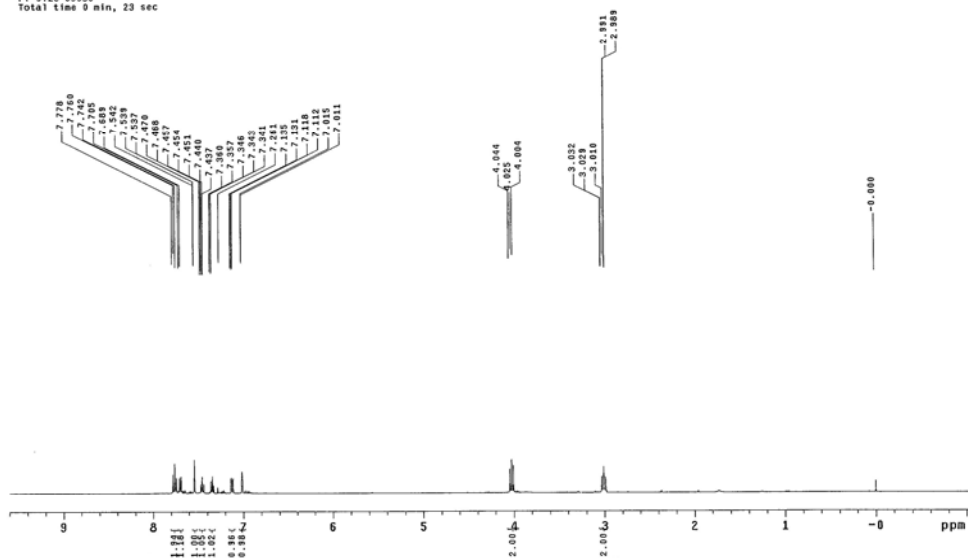

## STANDARD CARBON PARAMETERS

Archive directory: /export/home/ouyy/vnmrsys/data  
 Sample directory:  
 Pulse Sequence: s2pul  
 Solvent: cdcl3  
 Ambient temperature  
 User: j-10-87  
 File: q728  
 INOVA-500 "NMR500"

Relax. delay 0.500 sec  
 Pulse 45.0 degrees  
 Acq. time 1.300 sec  
 Width 31421.8 Hz  
 135 repetitions  
 OBSERVE C13, 125.6754704 MHz  
 DECOUPLE H1, 499.8050905 MHz  
 Power 42 dB  
 Continuously on  
 WALTZ-16 modulated  
 DATA PROCESSING  
 Line broadening 1.5 Hz  
 FT size 131072  
 Total time 2 hr, 3 min, 31 sec

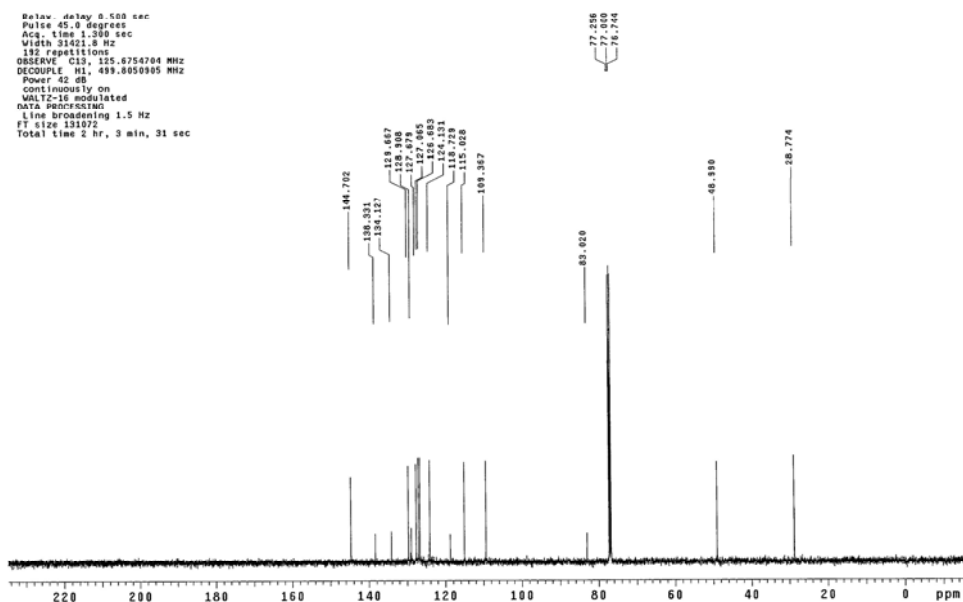

**Figure 9.** <sup>1</sup>H- (upper) and <sup>13</sup>C-NMR (lower) spectra of compound **2i**.

## STANDARD PROTON PARAMETERS

Archive directory: /export/home/liuy/vnmrsys/data  
 Sample directory:  
 Pulse Sequence: s2pu1  
 Solvent: CDCl<sub>3</sub>  
 Ambient temperature  
 File: y177  
 INOVA-500 "MENU500"

Relax. delay 1.000 sec  
 Pulse 45.0 degrees  
 Acq. time 1.892 sec  
 Width 7986.8 Hz  
 8 repetitions  
 OBSERVE H1: 499.8025907 MHz  
 DATA PROCESSING  
 FT size 65536  
 Total time 0 min, 23 sec

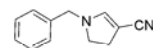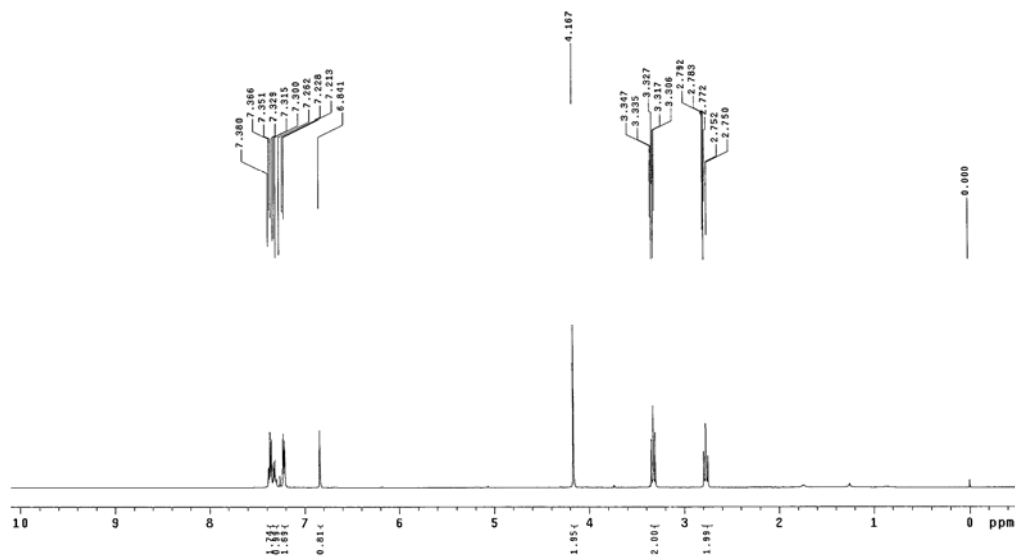

## STANDARD CARBON PARAMETERS

Archive directory: /export/home/liuy/vnmrsys/data  
 Sample directory:  
 File: CARBON  
 Pulse Sequence: s2pu1  
 Solvent: CDCl<sub>3</sub>  
 Ambient temperature  
 User: l-14-57  
 INOVA-500 "MENU500"

Relax. delay 0.300 sec  
 Pulse 45.0 degrees  
 Acq. time 1.300 sec  
 Width 31421.8 Hz  
 256 repetitions  
 OBSERVE C13: 125.6754742 MHz  
 DECOUPLE H1: 499.8050905 MHz  
 Power 60 dB  
 Continuously on  
 WALTZ-16 modulated  
 DATA PROCESSING  
 Line broadening 1.0 Hz  
 FT size 131072  
 Total time 1 hr, 49 min, 50 sec

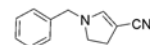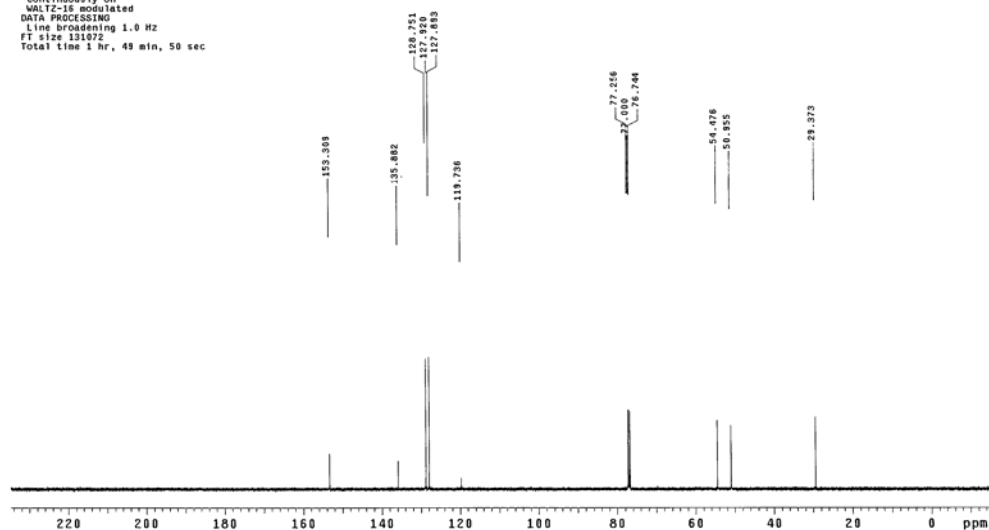

**Figure 10.** <sup>1</sup>H- (upper) and <sup>13</sup>C-NMR (lower) spectra of compound **2j**.

# STANDARD PROTON PARAMETERS

Archive directory: /export/home/luuy/vnmrsys/data  
Sample directory:  
Pulse Sequence: s2pu1  
Solvent: CDCl3  
Ambient temperature  
File: m567  
INOVA-500 "MENU500"

Relax. delay 1.000 sec  
Pulse 45.0 degrees  
Acq. time 1.852 sec  
Width 8319.2 Hz  
8 repetitions  
OBSERVE F1: 499.0025927 MHz  
DATA PROCESSING  
FT size 65536  
Total time 0 min, 23 sec

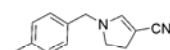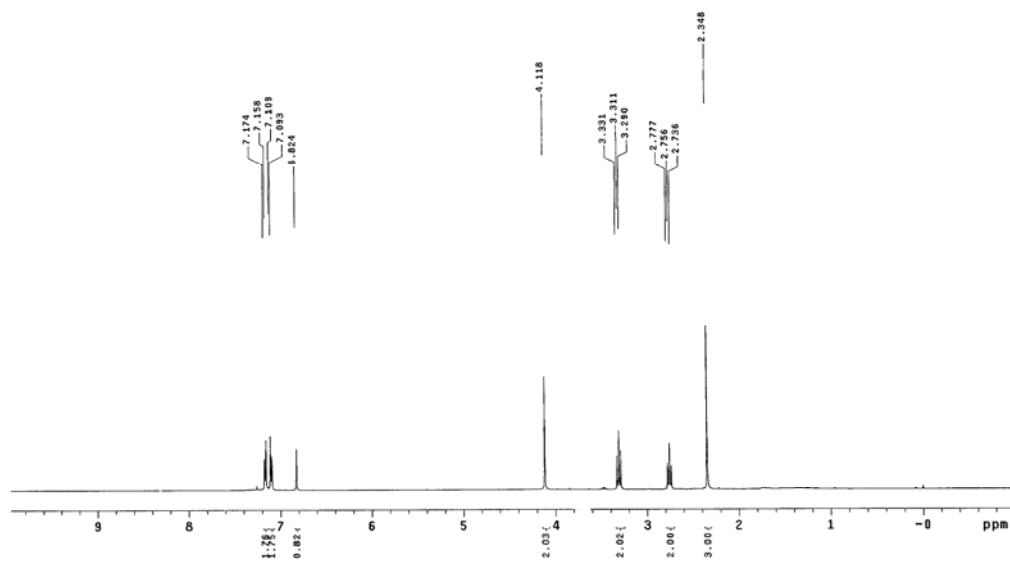

# STANDARD CARBON PARAMETERS

Archive directory: /export/home/luuy/vnmrsys/data  
Sample directory:  
Pulse Sequence: s2pu1  
Solvent: CDCl3  
Ambient temperature  
User: j-14-87  
File: m568  
INOVA-500 "MENU500"

Relax. delay 0.500 sec  
Pulse 45.0 degrees  
Acq. time 1.300 sec  
Width 31421.8 Hz  
128 repetitions  
OBSERVE C13: 125.6754970 MHz  
DECOUPLE H1: 499.0050905 MHz  
Power 40 dB  
Continuously on  
WALTZ-16 modulated  
DATA PROCESSING  
Line broadening 1.5 Hz  
FT size 131072  
Total time 3 hr, 56 sec

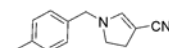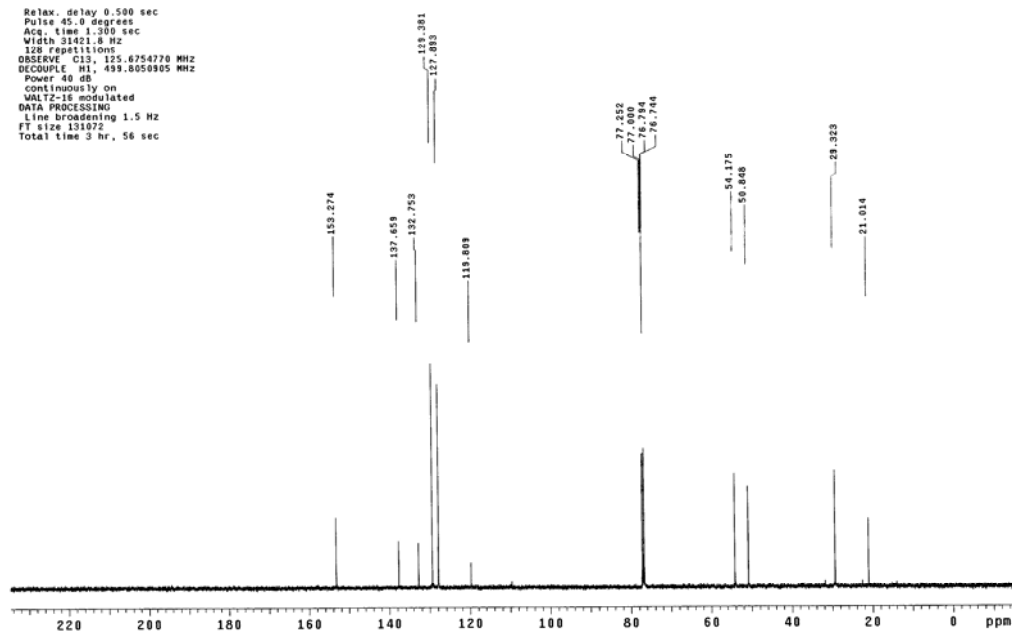

Figure 11. <sup>1</sup>H- (upper) and <sup>13</sup>C-NMR (lower) spectra of compound **2k**.

STANDARD PROTON PARAMETERS  
 Archive directory: /export/home/liuy/vnmrsys/data  
 Sample directory:  
 Pulse Sequence: s2pul  
 Solvent: CDCl3  
 Ambient temperature  
 File: 1652  
 INOVA-500 "NENUS00"  
 Relax. delay 1.000 sec  
 Pulse 45.0 degrees  
 Acq. time 1.852 sec  
 Width 8513.2 Hz  
 8 repetitions  
 OBSERVE H1, 499.8025805 MHz  
 DATA PROCESSING  
 FT size 65536  
 Total time 9 min, 23 sec

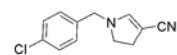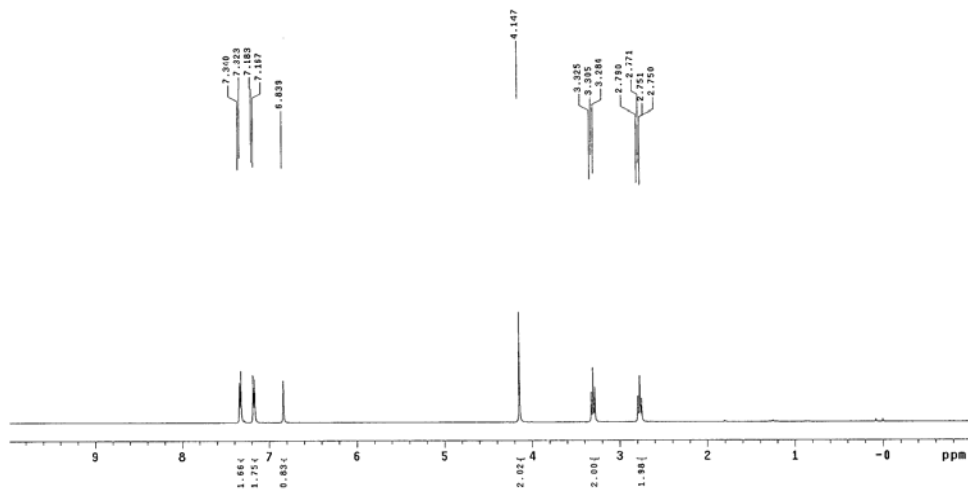

STANDARD CARBON PARAMETERS  
 Archive directory: /export/home/liuy/vnmrsys/data  
 Sample directory:  
 Pulse Sequence: s2pul  
 Solvent: CDCl3  
 Ambient temperature  
 User: 1-14-87  
 File: 1703  
 INOVA-500 "NENUS00"  
 Relax. delay 0.500 sec  
 Pulse 45.0 degrees  
 Acq. time 1.200 sec  
 Width 51421.6 Hz  
 64 repetitions  
 OBSERVE C13, 125.8754828 MHz  
 DECOUPLE H1, 499.8050905 MHz  
 Power 40 dB  
 continuously on  
 WALTZ-16 modulated  
 DATA PROCESSING  
 Line broadening 1.5 Hz  
 FT size 131072  
 Total time 2 hr, 3 min, 31 sec

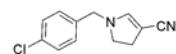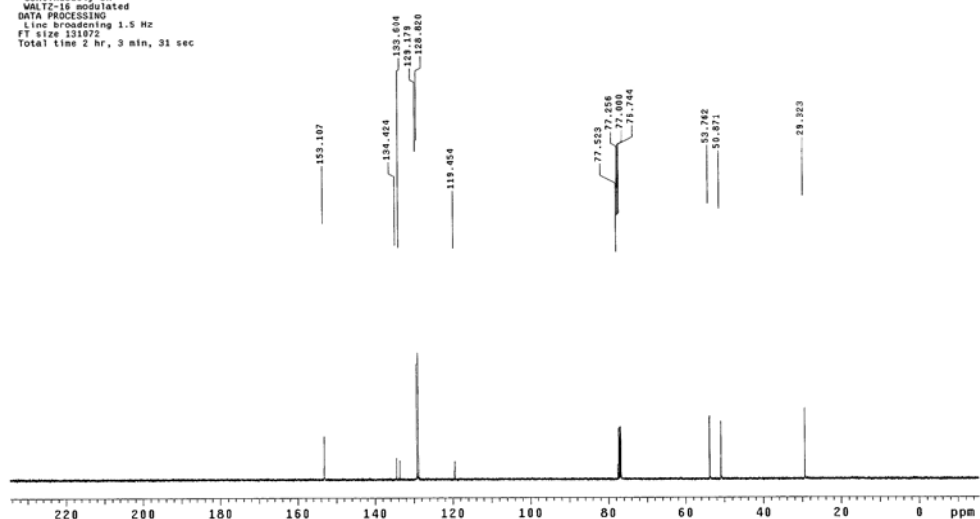

Figure 12.  $^1\text{H}$ - (upper) and  $^{13}\text{C}$ -NMR (lower) spectra of compound 21.

STANDARD PROTON PARAMETERS  
 Archive directory: /export/home/liuy/vnmrsys/data  
 Sample directory:  
 Pulse Sequence: s2pul  
 Solvent: CDCl3  
 Ambient temperature  
 File: m025  
 INOVA-500 "NENUS00"  
 Relax. delay 1.000 sec  
 Pulse 45.0 degrees  
 Acq. time 1.852 sec  
 Width 8513.2 Hz  
 8 repetitions  
 OBSERVE H1, 499.8025700 MHz  
 DATA PROCESSING  
 FT size 65536  
 Total time 9 min, 23 sec

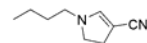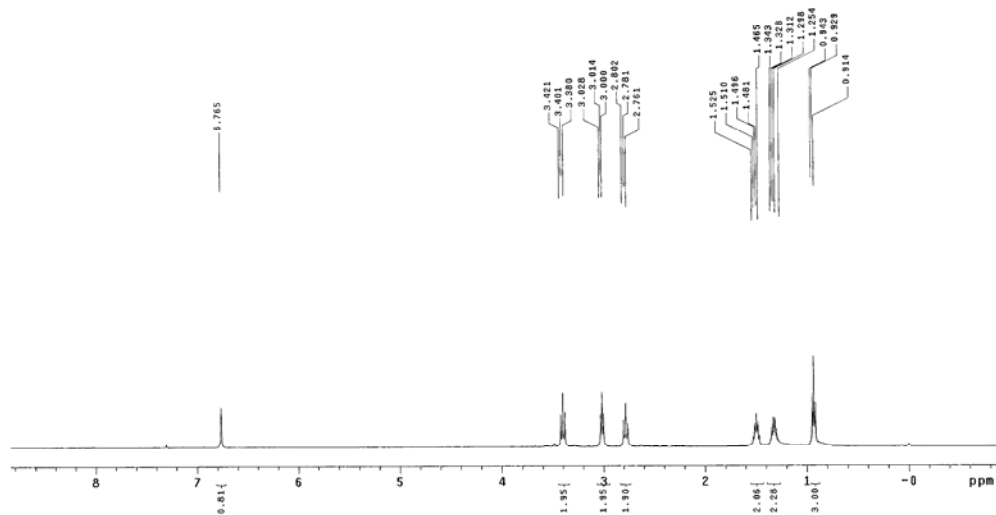

STANDARD CARBON PARAMETERS  
 Archive directory: /export/home/ouyy/vnmrsys/data  
 Sample directory:  
 Pulse Sequence: s2pul  
 Solvent: CDCl3  
 Ambient temperature  
 User: 1-14-87  
 File: m027  
 INOVA-500 "NENUS00"  
 Relax. delay 0.500 sec  
 Pulse 45.0 degrees  
 Acq. time 1.300 sec  
 Width 31421.8 Hz  
 84 repetitions  
 OBSERVE C13, 125.6754641 MHz  
 DECOUPLE H1, 499.8030805 MHz  
 Power 40 dB  
 Continuously on  
 WALTZ-16 modulated  
 DATA PROCESSING  
 Line broadening 1.5 Hz  
 FT size 131072  
 Total time 2 hr, 3 min, 31 sec

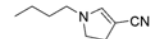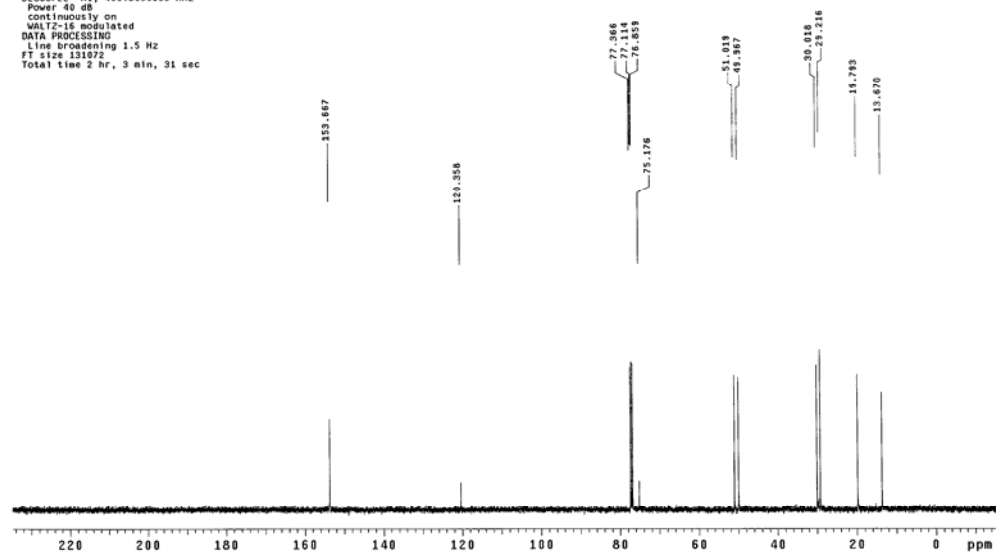

Figure 13.  $^1\text{H}$ - (upper) and  $^{13}\text{C}$ -NMR (lower) spectra of compound **2m**.

# STANDARD PROTON PARAMETERS

Archive directory: /export/home/ouyy/vnmrsys/data  
Sample directory:

Pulse Sequence: s2pul

Solvent: CDCl<sub>3</sub>

Ambient temperature

File: 0537

INOVA-500 "NMR500"

Relax. delay 1.000 sec

Pulse 45.0 degrees

Acq. time 1.852 sec

Width 8560.7 Hz

8 repetitions

OBSERVE H1, 499.8025883 MHz

DATA PROCESSING

FT size 65536

Total time 0 min, 23 sec

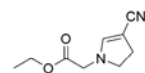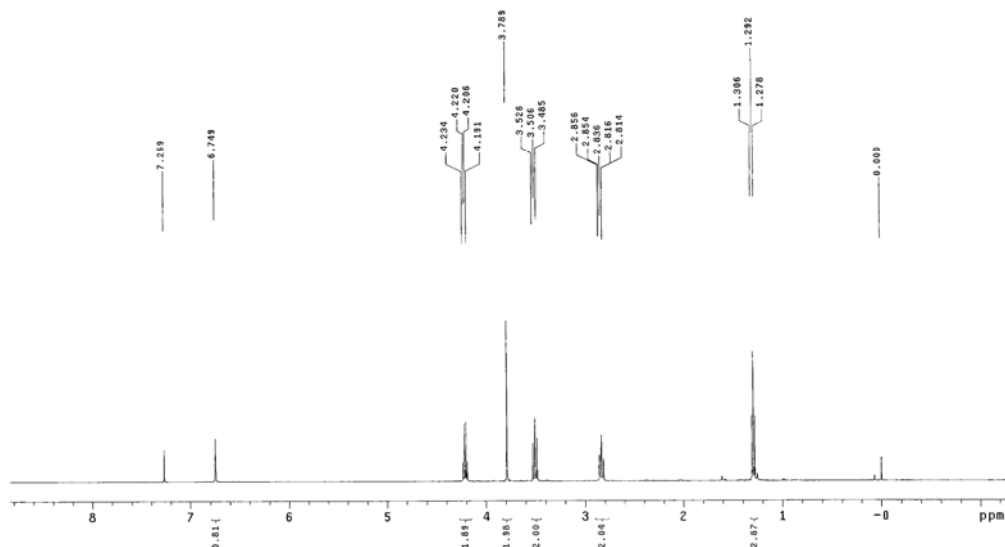

# STANDARD CARBON PARAMETERS

Archive directory: /export/home/ouyy/vnmrsys/data

Sample directory:

Pulse Sequence: s2pul

Solvent: cdcl3

Ambient temperature

User: 1-14-87

File: 0538

INNOVA-500 "NMR500"

Relax. delay 0.500 sec

Pulse 45.0 degrees

Acq. time 1.300 sec

Width 31401.8 Hz

182 repetitions

OBSERVE C13, 125.6754685 MHz

DECOUPLE H1, 499.8050905 MHz

Power 42 dB

continuously on

WALTZ-16 modulated

Line broadening 1.5 Hz

FT size 131072

Total time 3 hr, 56 sec

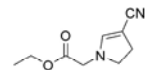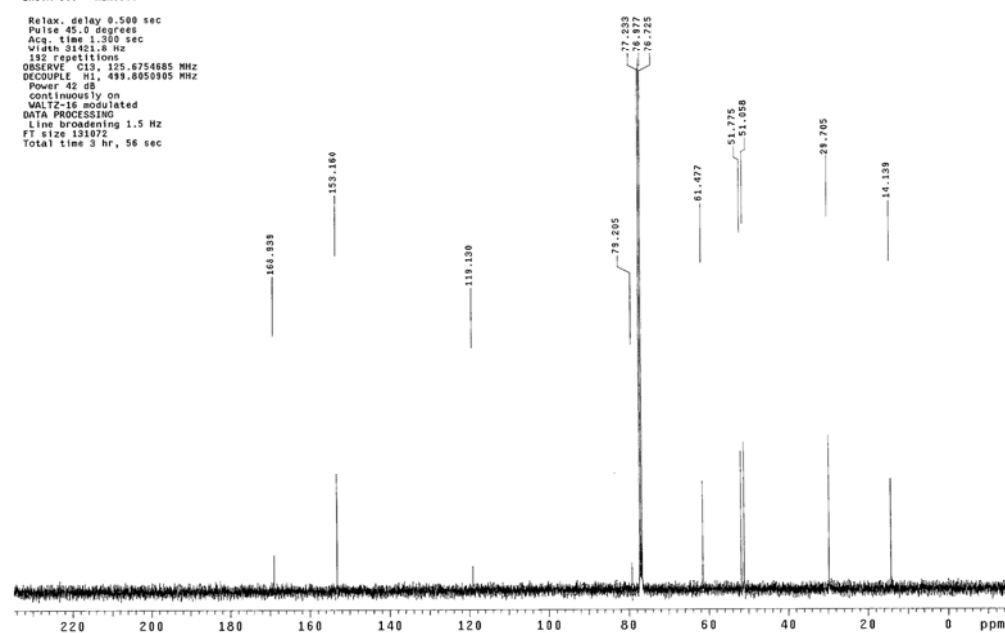

Figure 14. <sup>1</sup>H- (upper) and <sup>13</sup>C-NMR (lower) spectra of compound 2n.



STANDARD PROTON PARAMETERS  
 Archive directory: /export/home/ouyy/vnmrsys/data  
 Sample directory:  
 Pulse Sequence: s2pul  
 Solvent: CDCl3  
 Ambient temperature  
 File: s757  
 INOVA-500 "HENU500"  
 Relax. delay 1.000 sec  
 Pulse 45.0 degrees  
 Acq. time 1.892 sec  
 Width 8500.7 Hz  
 8 repetitions  
 OBSERVE H1, 499.8025901 MHz  
 DATA PROCESSING  
 FT size 65536  
 Total time 0 min, 23 sec

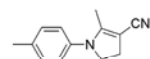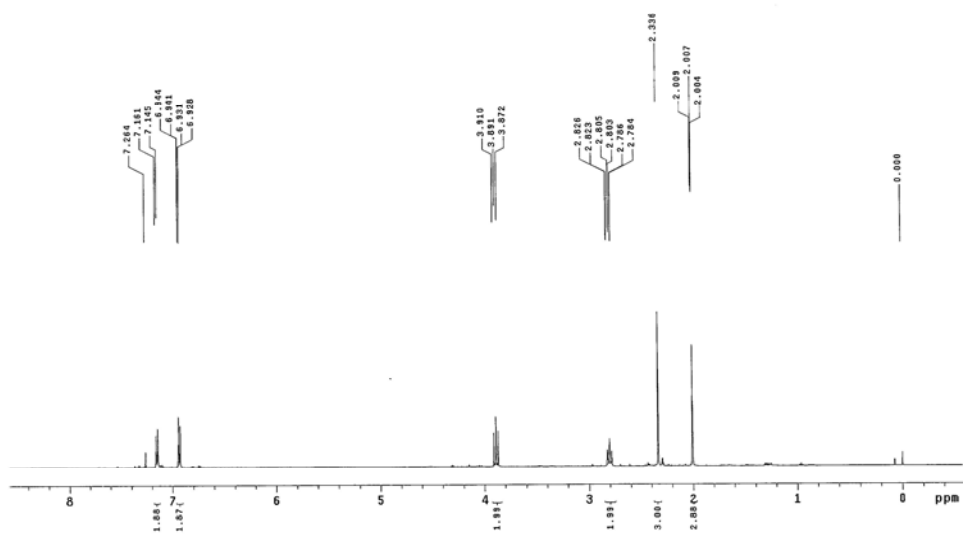

STANDARD CARBON PARAMETERS  
 Archive directory: /export/home/ouyy/vnmrsys/data  
 Sample directory:  
 Pulse Sequence: s2pul  
 Solvent: cdcl3  
 Ambient temperature  
 User: 1-14-87  
 File: s708  
 INOVA-500 "HENU500"  
 Relax. delay 0.500 sec  
 Pulse 45.0 degrees  
 Acq. time 1.890 sec  
 Width 31421.8 Hz  
 132 repetitions  
 OBSERVE C13, 125.6754894 MHz  
 DECOUPLE H1, 499.8058905 MHz  
 Power 42 dB  
 Continuously on  
 WALTZ-16 modulated  
 DATA PROCESSING  
 Line broadening 1.5 Hz  
 FT size 131072  
 Total time 2 hr, 3 min, 31 sec

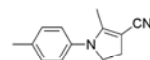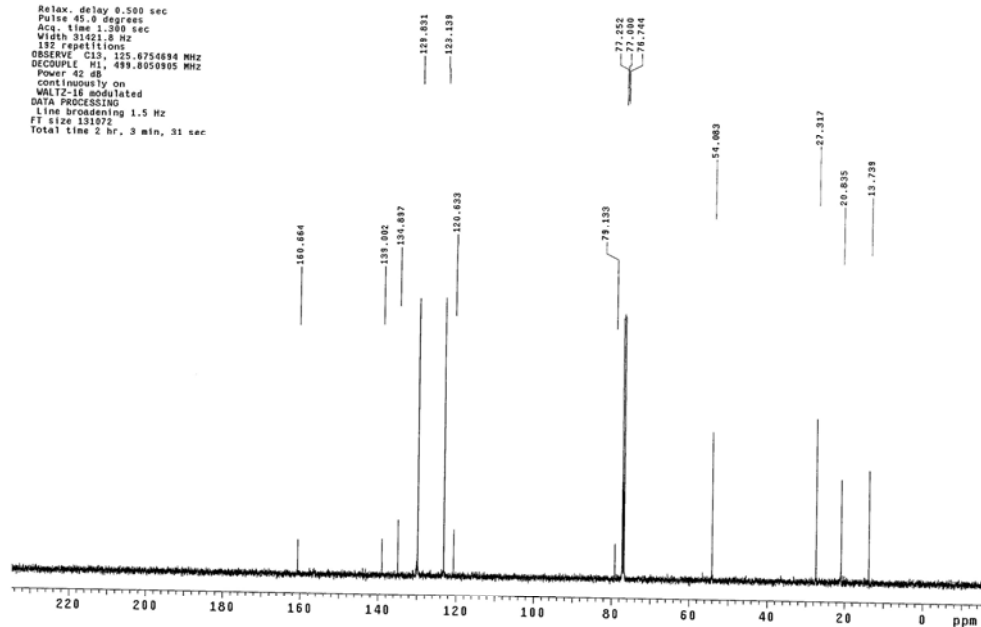

Figure 15.  $^1\text{H}$ - (upper) and  $^{13}\text{C}$ -NMR (lower) spectra of compound **2o**.

Cc1ccn(c1)-c2ccc(C)cc2

Pulse Sequence: s2pu1  
Solvent: CDCl3  
Ambient temperature  
File: q644  
INOVA-500 "NENU500"

Relax. delay 1.000 sec  
Pulse 45.0 degrees  
Acq. time 1.892 sec  
Width 8500.7 Hz  
8 repetitions  
OBSERVE H1, 499.8026041 MHz  
DATA PROCESSING  
FT size 65536  
Total time 0 min, 23 sec

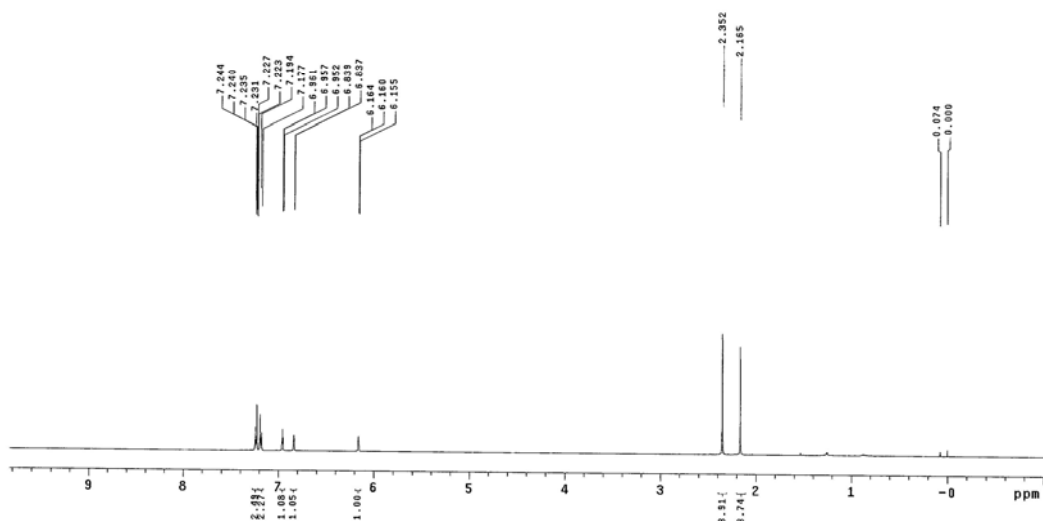Cc1ccccc1N2C=CC=C2C

Pulse Sequence: zgpg30  
Solvent: cdcl3  
Ambient temperature  
User: 1-14-87  
File: q645  
INNOVA-500 "NMR500"

```
Relax. delay 0.500 sec
Pulse 45.0 degrees
Acq. time 1.300 sec
Width 31421.8 Hz
192 repetitions
OBSERVE C13, 125.6754675 MHz
DECOUPLE H1, 499.8050905 MHz
Power 42 dB
continuously on
WALTZ-16 modulated
DATA PROCESSING
Line broadening 1.5 Hz
FT size 131072
Total time 2 hr, 3 min, 31 sec
```

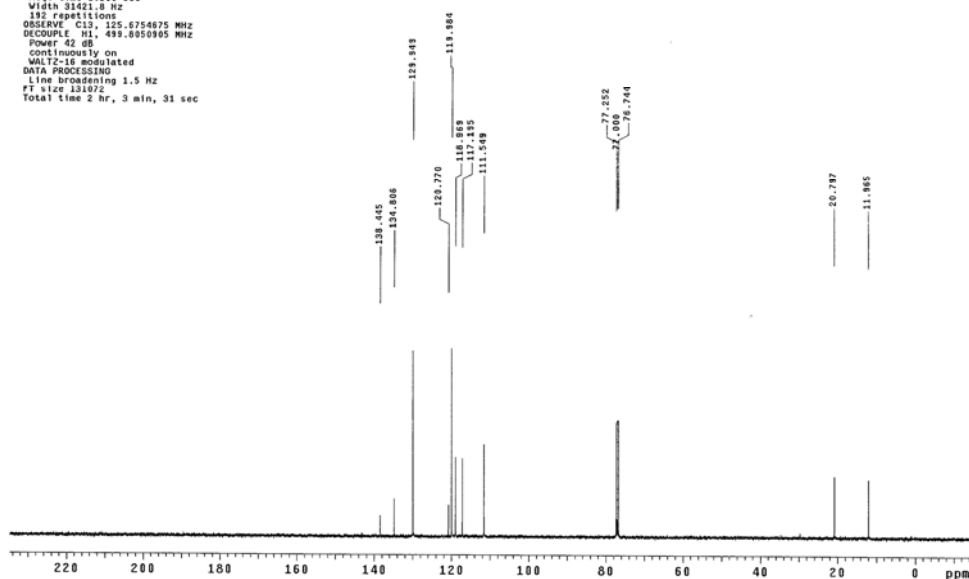

**Figure 16.**  $^1\text{H}$ - (upper) and  $^{13}\text{C}$ -NMR (lower) spectra of compound **4p**.

## STANDARD PROTON PARAMETERS

Archive directory: /export/home/liuy/vnmrsys/data  
 Sample directory:  
 Pulse Sequence: s2pu1  
 Solvent: CDCl3  
 Ambient temperature  
 File: c395  
 INOVA-500 "NENUS00"

Relax. delay 1.000 sec  
 Pulse 45.0 degrees  
 Acq. time 1.892 sec  
 Width 7596.8 Hz  
 8 repetitions  
 OBSERVE H1, 499.9025963 MHz  
 DATA PROCESSING  
 FT size 65536  
 Total time 9 min, 23 sec

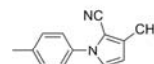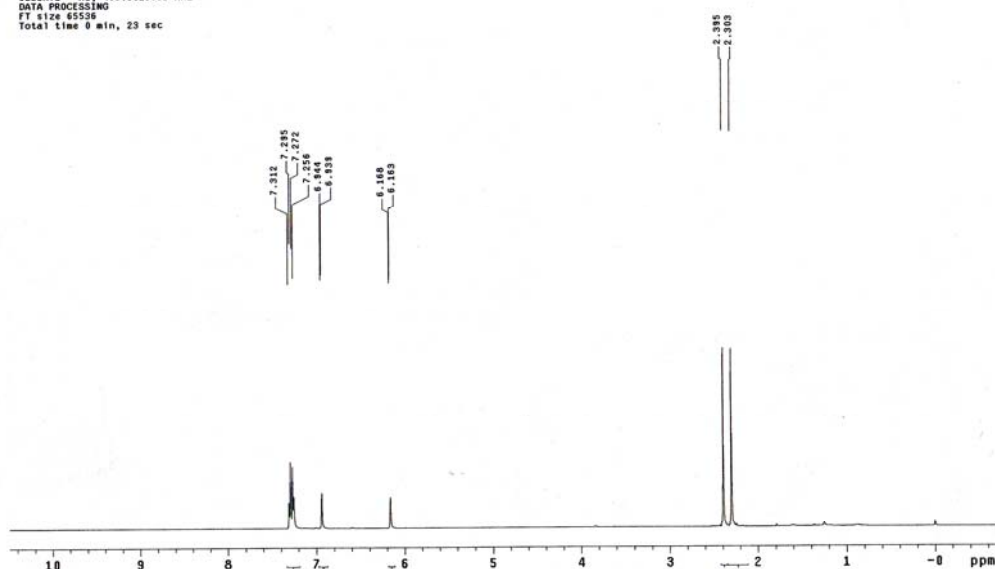

## STANDARD CARBON PARAMETERS

Archive directory: /export/home/liuy/vnmrsys/data  
 Sample directory:  
 Pulse Sequence: s2pu1  
 Solvent: CDCl3  
 Ambient temperature  
 User: 1-14-97  
 File: d47  
 INOVA-500 "NENUS00"

Relax. delay 0.300 sec  
 Pulse 45.0 degrees  
 Acq. time 1.390 sec  
 Width 31421.8 Hz  
 256 repetitions  
 OBSERVE C13, 125.6754685 MHz  
 DECOUPLE H1, 499.8050905 MHz  
 Power 40 dB  
 Continuously on  
 MALTZ-16 modulated  
 DATA PROCESSING  
 Line broadening 1.5 Hz  
 FT size 131072  
 Total time 1 hr, 49 min, 51 sec

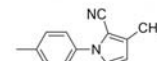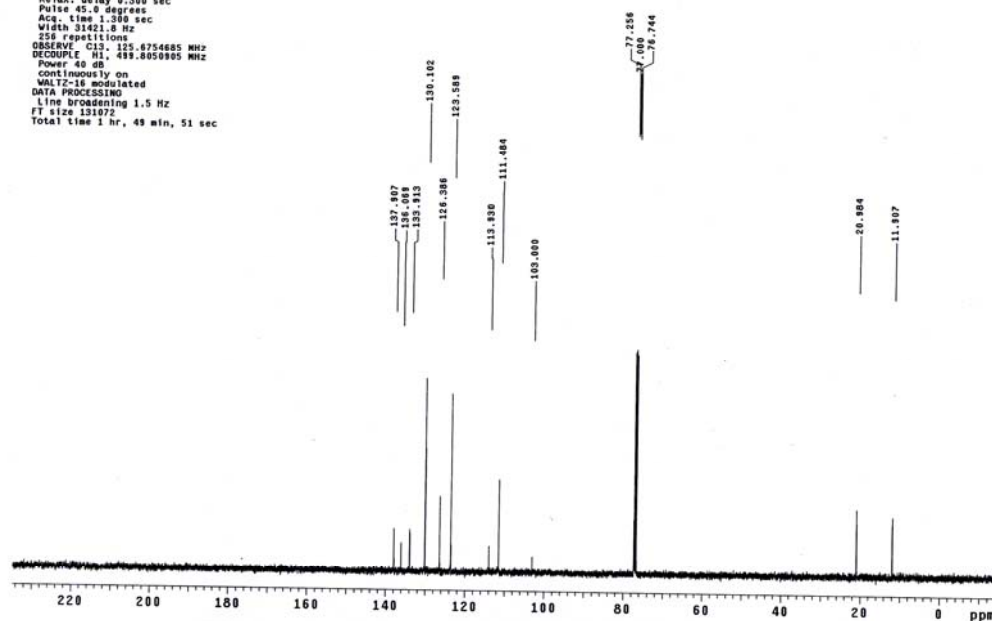

Figure 17.  $^1\text{H}$ - (upper) and  $^{13}\text{C}$ -NMR (lower) spectra of compound **5p**.
